# Supplementary material for: Structure of the human marker of self 5-transmembrane receptor CD47
Source: PubMed Central journal article supplement (PMC8410850; doi:10.1038/s41467-021-25475-w), 2021-09-01
Supplement: 41467_2021_25475_MOESM4_ESM.pdf [file 41467_2021_25475_MOESM4_ESM.pdf]

|                                 | 20 | 30    | 40  | 50  | 60  | 70 | 80  | 90  | 100    |        |    |    |    |    |    |      |      |        |        |     |     |    |      |      |      |      |         |         |         |         |         |
|---------------------------------|----|-------|-----|-----|-----|----|-----|-----|--------|--------|----|----|----|----|----|------|------|--------|--------|-----|-----|----|------|------|------|------|---------|---------|---------|---------|---------|
| CD47_HUMAN                      | CN | ETVVI | CFV | NME | AQN | T  | EVV | V   | KFKGRD | T      | TF | Q  | AL | NR | S  | VPTD | S    | SAKTEV | Q      | LLK | DA  | S  | KMDK | SDAV | SHT  | GNY  | CEVTELT |         |         |         |         |
| Northern_greater_galago         | CN | ETIS  | CFV | NME | EN  | T  | EVV | V   | KFKGKD | T      | TF | Q  | SD | NR | S  | HDSA | K    | TSG    | KI     | E   | LLK | DA | T    | MHQ  | SNAV | ..   | PGNY    | CEVTELT |         |         |         |
| Coquerels_sifaka                | CN | ETVVI | CFV | NIE | EN  | L  | NEV | V   | KFKGKD | T      | TF | Q  | QV | NR | S  | TYSG | N    | SAKTEV | P      | E   | LLK | DA | S    | KMDK | SDAV | ..   | LGNY    | CEVTELT |         |         |         |
| Common_marmoset                 | CN | ETVVI | CFV | NME | EN  | T  | EVV | V   | KFKGRD | T      | TF | Q  | AL | NR | S  | VPSG | N    | SAKTEV | R      | L   | LK  | DA | S    | KMDK | SDAV | SHT  | GNY     | CEVTELT |         |         |         |
| Black-capped_squirrel_monkey    | CN | ETVVI | CFV | NME | AQN | T  | EVV | V   | KFKGRD | T      | TF | Q  | AL | NR | F  | LP   | SD   | K      | TAKI   | E   | V   | Q  | L    | LK   | DA   | S    | KMDK    | SDAV    | SHT     | GNY     | CEVTELT |
| Panamanian_white-faced_capuchin | CN | ETVVI | CFV | NME | AQN | T  | EVV | V   | KFKGRD | T      | TF | Q  | AL | NR | S  | LP   | SG   | N      | SAKTEV | Q   | L   | LK | DA   | S    | KMDK | SDAV | SHT     | GNY     | CEVTELT |         |         |
| Nancy_Mas_night_monkey          | CN | ETVVI | CFV | NME | AQN | T  | EVV | V   | KFKGRD | T      | TF | Q  | AL | NR | S  | VPSG | N    | SAKTEV | Q      | L   | LK  | DA | S    | KMDK | SDAV | SHT  | GNY     | CEVTELT |         |         |         |
| Black_snub-nosed_monkey         | CN | ETVVI | CFV | NME | AQN | T  | EVV | V   | KFKGRD | T      | TF | Q  | AL | NR | S  | VSTN | S    | SAKTEV | Q      | L   | LK  | DA | S    | KMDK | SDAV | SHT  | GNY     | CEVTELT |         |         |         |
| Golden_snub-nosed_monkey        | CN | ETVVI | CFV | NME | AQN | T  | EVV | V   | KFKGRD | T      | TF | Q  | AL | NR | S  | VSTN | S    | SAKTEV | Q      | L   | LK  | DA | S    | KMDK | SDAV | SHT  | GNY     | CEVTELT |         |         |         |
| Angolan_Colobus                 | CN | ETVVI | CFV | NME | AQN | T  | EVV | V   | KFKGRD | T      | TF | Q  | AL | NR | S  | VSTN | S    | SAKTEV | Q      | L   | LK  | DA | S    | KMDK | SDAV | SHT  | GNY     | CEVTELT |         |         |         |
| Rhesus_macaque                  | CN | ETVVI | CFV | NME | AQN | T  | EVV | V   | KFKGRD | T      | TF | Q  | AL | NR | S  | VSTN | S    | SAKTEV | Q      | L   | LK  | DA | S    | KMDK | SDAV | SHT  | GNY     | CEVTELT |         |         |         |
| Green_monkey                    | CN | ETVVI | CFV | NME | AQN | T  | EVV | V   | KFKGRD | T      | TF | Q  | AL | NR | S  | VSTN | S    | SAKTEV | Q      | L   | LK  | DA | S    | KMDK | SDAV | SHT  | GNY     | CEVTELT |         |         |         |
| Sooty_mangabey                  | CN | ETVVI | CFV | NME | AQN | T  | EVV | V   | KFKGRD | T      | TF | Q  | AL | NR | S  | VSTN | S    | SAKTEV | Q      | L   | LK  | DA | S    | KMDK | SDAV | SHT  | GNY     | CEVTELT |         |         |         |
| Olive_baboon                    | CN | ETVVI | CFV | NME | AQN | T  | EVV | V   | KFKGRD | T      | TF | Q  | AL | NR | S  | VSTN | S    | SAKTEV | Q      | L   | LK  | DA | S    | KMDK | SDAV | SHT  | GNY     | CEVTELT |         |         |         |
| Crab-eating_macaque             | CN | ETVVI | CFV | NME | AQN | T  | EVV | V   | KFKGRD | T      | TF | Q  | AL | NR | S  | VSTN | S    | SAKTEV | Q      | L   | LK  | DA | S    | KMDK | SDAV | SHT  | GNY     | CEVTELT |         |         |         |
| Southern_pig-tailed_macaque     | CN | ETVVI | CFV | NME | AQN | T  | EVV | V   | KFKGRD | T      | TF | Q  | AL | NR | S  | VSTN | S    | SAKTEV | Q      | L   | LK  | DA | S    | KMDK | SDAV | SHT  | GNY     | CEVTELT |         |         |         |
| Drill                           | CN | ETVVI | CFV | NME | AQN | T  | EVV | V   | KFKGRD | T      | TF | Q  | AL | NR | S  | VSTN | S    | SAKTEV | Q      | L   | LK  | DA | S    | KMDK | SDAV | SHT  | GNY     | CEVTELT |         |         |         |
| Northern_white-cheeked_gibbon   | CN | ETVVI | CFV | NME | AQN | T  | EVV | V   | KFKGRD | T      | TF | Q  | AL | NR | S  | VPTD | S    | SAKTEV | Q      | L   | LK  | DA | S    | KMDK | SDAV | SHT  | GNY     | CEVTELT |         |         |         |
| Sumatran_orangutan              | CN | ETVVI | CFV | NME | AQN | T  | EVV | V   | KFKGRD | T      | TF | Q  | AL | NR | S  | VPTD | S    | SAKTEV | Q      | L   | LK  | DA | S    | KMDK | SDAV | SHT  | GNY     | CEVTELT |         |         |         |
| Western_gorilla                 | CN | ETVVI | CFV | NME | AQN | T  | EVV | V   | KFKGRD | T      | TF | Q  | AL | NR | S  | VPTD | S    | SAKTEV | Q      | L   | LK  | DA | S    | KMDK | SDAV | SHT  | GNY     | CEVTELT |         |         |         |
| Chimpanzee                      | CN | ETVVI | CFV | NME | AQN | T  | EVV | V   | KFKGRD | T      | TF | Q  | AL | NR | S  | VPTD | S    | SAKTEV | Q      | L   | LK  | DA | S    | KMDK | SDAV | SHT  | GNY     | CEVTELT |         |         |         |
| Bonobo                          | CN | ETVVI | CFV | NME | AQN | T  | EVV | V   | KFKGRD | T      | TF | Q  | AL | NR | S  | VPTD | S    | SAKTEV | Q      | L   | LK  | DA | S    | KMDK | SDAV | SHT  | GNY     | CEVTELT |         |         |         |
| African_elephant                | CN | ETLVI | CFV | NVE | TKL | E  | LVY | V   | KFKGRD | T      | TF | Q  | SR | NR | S  | PSSN | H    | SAE    | TP     | E   | L   | LK | DA   | S    | KMDK | SDAV | ..      | PGNY    | CEVTELT |         |         |
| Golden_hamster                  | CN | ETVVI | CFV | NVE | AS  | T  | EMV | V   | KLNKTY | I      | Y  | Q  | SK | NR | S  | VETN | S    | SAKISL | D      | L   | LK  | DA | S    | KMDK | QAV  | ..   | PGNY    | CEVTELT |         |         |         |
| Mouse                           | CN | ETVVI | CFV | NVE | AS  | T  | EMV | V   | KLNKSY | I      | Y  | Q  | SK | NS | T  | TD   | QN   | H      | SAKISV | D   | L   | LK | DA   | S    | KMDK | RDAM | ..      | PGNY    | CEVTELT |         |         |
| Rat                             | CN | ETVVI | CFV | NVE | AS  | T  | EMV | V   | KLNKSY | I      | Y  | Q  | SK | NS | T  | RE   | QN   | H      | SAKISV | D   | L   | LK | DA   | S    | KMDK | RDAM | ..      | PGNY    | CEVTELT |         |         |
| Guinea_pig                      | CN | KTIVV | CFV | NVE | AS  | T  | EMV | V   | KLNKTY | I      | Y  | Q  | SK | NR | S  | AKNK | S    | SAKTEV | K      | L   | LK  | DA | S    | KMDK | EDVK | ..   | PGNY    | CEVTELT |         |         |         |
| Naked_mole_rat                  | CN | KTIVV | CFV | NVE | AS  | T  | EMV | V   | KLNKTY | I      | Y  | Q  | SK | NR | S  | ANLN | S    | SAKTEV | K      | L   | LK  | DA | S    | KMDK | EDVK | ..   | PGNY    | CEVTELT |         |         |         |
| American_beaver                 | CN | ETVVI | CFV | NVE | AS  | T  | EMV | V   | KLNKTY | I      | Y  | Q  | SK | NR | S  | ADKN | S    | SAKTEV | K      | L   | LK  | DA | S    | KMDK | EDVK | ..   | PGNY    | CEVTELT |         |         |         |
| Ords_kangaroo_rat               | CN | ETVVI | CFV | NVE | AS  | T  | EMV | V   | KLNKTY | I      | Y  | Q  | SK | NR | S  | ADSN | S    | SAKTEV | K      | L   | LK  | DA | S    | KMDK | EDVK | ..   | PGNY    | CEVTELT |         |         |         |
| Horse                           | CN | KTIVV | CFV | NVE | AS  | T  | EMV | V   | KLNKTY | I      | Y  | Q  | SK | NR | S  | ADSN | S    | SAKTEV | K      | L   | LK  | DA | S    | KMDK | EDVK | ..   | PGNY    | CEVTELT |         |         |         |
| Western_European_hedgehog       | CN | KTIVV | CFV | NVE | AS  | T  | EMV | V   | KLNKTY | I      | Y  | Q  | SK | NR | S  | ADSN | S    | SAKTEV | K      | L   | LK  | DA | S    | KMDK | EDVK | ..   | PGNY    | CEVTELT |         |         |         |
| Cat                             | CN | KTIVV | CFV | NVE | AS  | T  | EMV | V   | KLNKTY | I      | Y  | Q  | SK | NR | S  | ADSN | S    | SAKTEV | K      | L   | LK  | DA | S    | KMDK | EDVK | ..   | PGNY    | CEVTELT |         |         |         |
| Weddell_seal                    | CN | ESVVI | CFV | NVE | AT  | N  | I   | EMV | V      | KFKGKD | T  | TF | Q  | AL | NR | S    | RDNK | K      | STKI   | IP  | K   | L  | LK   | DA   | S    | KMDK | EDVK    | ..      | PGNY    | CEVTELT |         |
| Dog                             | CN | ESVVI | CFV | NVE | AT  | N  | I   | EMV | V      | KFKGKD | T  | TF | Q  | AL | NR | S    | RDNK | K      | STKI   | IP  | K   | L  | LK   | DA   | S    | KMDK | EDVK    | ..      | PGNY    | CEVTELT |         |
| Red_fox                         | CN | ESVVI | CFV | NVE | AT  | N  | I   | EMV | V      | KFKGKD | T  | TF | Q  | AL | NR | S    | RDNK | K      | STKI   | IP  | K   | L  | LK   | DA   | S    | KMDK | EDVK    | ..      | PGNY    | CEVTELT |         |
| Hawaiian_monk_seal              | CN | ESVVI | CFV | NVE | AT  | N  | I   | EMV | V      | KFKGKD | T  | TF | Q  | AL | NR | S    | RDNK | K      | STKI   | IP  | K   | L  | LK   | DA   | S    | KMDK | EDVK    | ..      | PGNY    | CEVTELT |         |
| American_black_bear             | CN | ESVVI | CFV | NVE | AT  | N  | I   | EMV | V      | KFKGKD | T  | TF | Q  | AL | NR | S    | RDNK | K      | STKI   | IP  | K   | L  | LK   | DA   | S    | KMDK | EDVK    | ..      | PGNY    | CEVTELT |         |
| Grizzly_bear                    | CN | ESVVI | CFV | NVE | AT  | N  | I   | EMV | V      | KFKGKD | T  | TF | Q  | AL | NR | S    | RDNK | K      | STKI   | IP  | K   | L  | LK   | DA   | S    | KMDK | EDVK    | ..      | PGNY    | CEVTELT |         |
| Northern_fur_seal               | CN | ESVVI | CFV | NVE | AT  | N  | I   | EMV | V      | KFKGKD | T  | TF | Q  | AL | NR | S    | RDNK | K      | STKI   | IP  | K   | L  | LK   | DA   | S    | KMDK | EDVK    | ..      | PGNY    | CEVTELT |         |
| Pacific_walrus                  | CN | ESVVI | CFV | NVE | AT  | N  | I   | EMV | V      | KFKGKD | T  | TF | Q  | AL | NR | S    | RDNK | K      | STKI   | IP  | K   | L  | LK   | DA   | S    | KMDK | EDVK    | ..      | PGNY    | CEVTELT |         |
| Giant_panda                     | CN | ESVVI | CFV | NVE | AT  | N  | I   | EMV | V      | KFKGKD | T  | TF | Q  | AL | NR | S    | RDNK | K      | STKI   | IP  | K   | L  | LK   | DA   | S    | KMDK | EDVK    | ..      | PGNY    | CEVTELT |         |
| Polar_bear                      | CN | ESVVI | CFV | NVE | AT  | N  | I   | EMV | V      | KFKGKD | T  | TF | Q  | AL | NR | S    | RDNK | K      | STKI   | IP  | K   | L  | LK   | DA   | S    | KMDK | EDVK    | ..      | PGNY    | CEVTELT |         |
| European_domestic_ferret        | CN | ESVVI | CFV | NVE | AT  | N  | I   | EMV | V      | KFKGKD | T  | TF | Q  | AL | NR | S    | RDNK | K      | STKI   | IP  | K   | L  | LK   | DA   | S    | KMDK | EDVK    | ..      | PGNY    | CEVTELT |         |
| Sea_otter                       | CN | ESVVI | CFV | NVE | AT  | N  | I   | EMV | V      | KFKGKD | T  | TF | Q  | AL | NR | S    | RDNK | K      | STKI   | IP  | K   | L  | LK   | DA   | S    | KMDK | EDVK    | ..      | PGNY    | CEVTELT |         |
| Little_brown_bat                | CN | KTIVV | CFV | NVE | AS  | T  | EMV | V   | KLNKTY | I      | Y  | Q  | SK | NR | S  | PNSN | S    | SAF    | TP     | E   | L   | LK | DA   | S    | KMDK | SDAV | ..      | PGNY    | CEVTELT |         |         |
| Hybrid_cattle                   | CN | OTVVI | CFV | NVE | TKN | I  | ELV | V   | KFKGEN | I      | FF | Q  | SR | NR | S  | PSSN | S    | SAE    | AP     | E   | L   | LK | DA   | S    | KMDK | SDAV | ..      | PGNY    | CEVTELT |         |         |
| Cow                             | CN | OTVVI | CFV | NVE | TKN | I  | ELV | V   | KFKGEN | I      | FF | Q  | SR | NR | S  | PSSN | S    | SAE    | AP     | E   | L   | LK | DA   | S    | KMDK | SDAV | ..      | PGNY    | CEVTELT |         |         |
| Sheep                           | CN | OTVVI | CFV | NVE | TKN | I  | ELV | V   | KFKGEN | I      | FF | Q  | SR | NR | S  | PSSN | S    | SAE    | AP     | E   | L   | LK | DA   | S    | KMDK | SDAV | ..      | PGNY    | CEVTELT |         |         |
| Goat                            | CN | OTVVI | CFV | NVE | TKN | I  | ELV | V   | KFKGEN | I      | FF | Q  | SR | NR | S  | PSSN | S    | SAE    | AP     | E   | L   | LK | DA   | S    | KMDK | SDAV | ..      | PGNY    | CEVTELT |         |         |
| Pig                             | CN | OTVVI | CFV | NVE | TKN | I  | ELV | V   | KFKGEN | I      | FF | Q  | SR | NR | S  | PSSN | S    | SAE    | AP     | E   | L   | LK | DA   | S    | KMDK | SDAV | ..      | PGNY    | CEVTELT |         |         |
| Atlantic_bottle-nosed_dolphin   | CN | ETVVI | CFV | NIE | AKS | I  | ELV | V   | KFKGKD | T      | TF | Q  | AL | NR | S  | SSDI | H    | SAKISL | E      | L   | LK  | DA | S    | KMDK | SDAV | ..   | PGNY    | CEVTELT |         |         |         |
| Yangtze_finless_porpoise        | CN | ETVVI | CFV | NIE | AKS | I  | ELV | V   | KFKGKD | T      | TF | Q  | AL | NR | S  | SSDI | H    | SAKISL | E      | L   | LK  | DA | S    | KMDK | SDAV | ..   | PGNY    | CEVTELT |         |         |         |
| Yangtze_river_dolphin           | CN | ETVVI | CFV | NIE | AKS | I  | ELV | V   | KFKGKD | T      | TF | Q  | AL | NR | S  | SSDI | H    | SAKISL | E      | L   | LK  | DA | S    | KMDK | SDAV | ..   | PGNY    | CEVTELT |         |         |         |
| Beluga_whale                    | CN | ETVVI | CFV | NIE | AKS | I  | ELV | V   | KFKGKD | T      | TF | Q  | AL | NR | S  | SSDI | H    | SAKISL | E      | L   | LK  | DA | S    | KMDK | SDAV | ..   | PGNY    | CEVTELT |         |         |         |
| North_pacific_minke_whale       | CN | ETVVI | CFV | NIE | AKS | I  | ELV | V   | KFKGKD | T      | TF | Q  | AL | NR | S  | SSDI | H    | SAKISL | E      | L   | LK  | DA | S    | KMDK | SDAV | ..   | PGNY    | CEVTELT |         |         |         |
| Sperm_whale                     | CN | ETVVI | CFV | NIE | AKS | I  | ELV | V   | KFKGKD | T      | TF | Q  | AL | NR | S  | SSDI | H    | SAKISL | E      | L   | LK  | DA | S    | KMDK | SDAV | ..   | PGNY    | CEVTELT |         |         |         |
| Duckbill                        | CN | HSVLI | CFV | NIE | AKS | I  | ELV | V   | KFKGKD | T      | TF | Q  | AL | NR | S  | SSDI | H    | SAKISL | E      | L   | LK  | DA | S    | KMDK | SDAV | ..   | PGNY    | CEVTELT |         |         |         |
| Common                          | CN | ETVVI | CFV | NIE | AKS | I  | ELV | V   | KFKGKD | T      | TF | Q  | AL | NR | S  | SSDI | H    | SAKISL | E      | L   | LK  | DA | S    | KMDK | SDAV | ..   | PGNY    | CEVTELT |         |         |         |
| Tasmanian                       | CN | ETVVI | CFV | NIE | AKS | I  | ELV | V   | KFKGKD | T      | TF | Q  | AL | NR | S  | SSDI | H    | SAKISL | E      | L   | LK  | DA | S    | KMDK | SDAV | ..   | PGNY    | CEVTELT |         |         |         |
| Indian_muntjac                  | CN | OTVVI | CFV | NVE | TKN | I  | ELV | V   | KFKGEN | I      | FF | Q  | SR | NR | S  | PSSN | S    | SAE    | AP     | E   | L   | LK | DA   | S    | KMDK | SDAV | ..      | PGNY    | CEVTELT |         |         |
| Reeves_muntjac                  | CN | OTVVI | CFV | NVE | TKN | I  | ELV | V   | KFKGEN | I      | FF | Q  | SR | NR | S  | PSSN | S    | SAE    | AP     | E   | L   | LK | DA   | S    | KMDK | SDAV | ..      | PGNY    | CEVTELT |         |         |
| Domestic_yak                    | CN | OTVVI | CFV | NVE | TKN | I  | ELV | V   | KFKGEN | I      | FF | Q  | SR | NR | S  | PSSN | S    | SAE    | AP     | E   | L   | LK | DA   | S    | KMDK | SDAV | ..      | PGNY    | CEVTELT |         |         |
| Spotted_hyena                   | CN | ETVVI | CFV | NIE | AKS | I  | ELV | V   | KFKGKD | T      | TF |    |    |    |    |      |      |        |        |     |     |    |      |      |      |      |         |         |         |         |         |

|                                 | 110           | 120                       | 130             | 140        | 150    | 160               |
|---------------------------------|---------------|---------------------------|-----------------|------------|--------|-------------------|
| CD47_HUMAN                      | REGETIELKRYV  | VSWSFSPN                  | ELIVIP          | FALIFWGFG  | KTKYRS | GGMDKTIALLVAGLV   |
| Northern_greater_galago         | REGETIEVKYRI  | VSWSFSPN                  | ELIVIP          | FALLIFWGFG | KTKYRS | GRMDKTIALLVAGLL   |
| Coquerels_sifaka                | REGETIEVKYRI  | VPWSFSPN                  | ELIVIP          | FALLIFWGFG | KTKYRS | SHMDKTIALLVAGLV   |
| Common_marmoset                 | REGETIEVKYRI  | GTLGDRWKSCHLTNKERKEIEGIVQ | ELIVIP          | FALLIFWGFG | KTKYRS | GGMDKTIALLVAGLT   |
| Black-capped_squirrel_monkey    | REGETIEVKYRI  | VSWSFSPN                  | ELIVIP          | FALLIFWGFG | KTKYRS | GGMDKTIALLVAGLT   |
| Panamanian_white-faced_capuchin | REGETIEVKYRI  | VSWSFSPN                  | ELIVIP          | FALLIFWGFG | KTKYRS | GGMDKTIALLVAGLT   |
| Nancy_Mas_night_monkey          | REGETIEVKYRI  | VSWSFSPN                  | ELIVIP          | FALLIFWGFG | KTKYRS | GGMDKTIALLVAGLT   |
| Black_snub-nosed_monkey         | REGETIEVKYRI  | VSWSFSPN                  | ELIVIP          | FALLIFWGFG | KTKYRS | GGMDKTIALLVAGLM   |
| Golden_snub-nosed_monkey        | REGETIEVKYRI  | VSWSFSPN                  | ELIVIP          | FALLIFWGFG | KTKYRS | GGMDKTIALLVAGLM   |
| Angolan_Colobus                 | REGETIEVKYRI  | VSWSFSPN                  | ELIVIP          | FALLIFWGFG | KTKYRS | GGMDKTIALLVAGLM   |
| Rhesus_macaque                  | REGETIEVKYRI  | VSWSFSPN                  | ELIVIP          | FALLIFWGFG | KTKYRS | GGMDKTIALLVAGLM   |
| Green_monkey                    | REGETIEVKYRI  | VSWSFSPN                  | ELIVIP          | FALLIFWGFG | KTKYRS | GGMDKTIALLVAGLM   |
| Sooty_mangabey                  | REGETIEVKYRI  | VSWSFSPN                  | ELIVIP          | FALLIFWGFG | KTKYRS | GGMDKTIALLVAGLM   |
| Olive_baboon                    | REGETIEVKYRI  | VSWSFSPN                  | ELIVIP          | FALLIFWGFG | KTKYRS | GGMDKTIALLVAGLM   |
| Crab-eating_macaque             | REGETIEVKYRI  | VSWSFSPN                  | ELIVIP          | FALLIFWGFG | KTKYRS | GGMDKTIALLVAGLM   |
| Southern_pig-tailed_macaque     | REGETIEVKYRI  | VSWSFSPN                  | ELIVIP          | FALLIFWGFG | KTKYRS | GGMDKTIALLVAGLM   |
| Drill                           | REGETIEVKYRI  | VSWSFSPN                  | ELIVIP          | FALLIFWGFG | KTKYRS | GGMDKTIALLVAGLM   |
| Northern_white-cheeked_gibbon   | REGETIEVKYRI  | VSWSFSPN                  | ELIVIP          | FALLIFWGFG | KTKYRS | GGMDKTIALLVAGLM   |
| Sumatran_orangutan              | REGETIEVKYRI  | VSWSFSPN                  | ELIVIP          | FALLIFWGFG | KTKYRS | GGMDKTIALLVAGLI   |
| Western_gorilla                 | REGETIEVKYRI  | VSWSFSPN                  | ELIVIP          | FALLIFWGFG | KTKYRS | GGMDKTIALLVAGLM   |
| Chimpanzee                      | REGETIEVKYRI  | VSWSFSPN                  | ELIVIP          | FALLIFWGFG | KTKYRS | GGMDKTIALLVAGLM   |
| Bonobo                          | REGETIEVKYRI  | VSWSFSPN                  | ELIVIP          | FALLIFWGFG | KTKYRS | GGMDKTIALLVAGLM   |
| African_elephant                | REGETTQLKYRV  | VSWSFQK                   | ELIVIP          | FALLIFWGFG | LLNSK  | SRMNQETISLVLAGLF  |
| Golden_hamster                  | REGKTVEIKYRI  | ASWSFSPN                  | ELIVIP          | FALLIFWGFG | LTKYRS | TRTNKRIALLVAGLV   |
| Mouse                           | REGKTVEIKNRT  | VSWSFSPN                  | ELIVIP          | FALLIFWGFG | LTKYRS | SHTNKRIALLVAGLV   |
| Rat                             | REGKTVEIKNRP  | VSWSFTN                   | ELIVIP          | FALLIFWGFG | LTKYRS | SHTNKRIALLVAGLA   |
| Guinea_pig                      | REGETVVEVKYRM | VSWSFSPN                  | ELIVIP          | FALLIFWGFG | LTKYRS | NCTNMKIIALLVAGLL  |
| Naked_mole_rat                  | REGETVVEVKYRM | VSWSFSPN                  | ELIVIP          | FALLIFWGFG | LTKYRS | NCTSTKIIALLVAGLL  |
| American_beaver                 | REGETVVEVKYRV | VSWSFSPN                  | ELIVIP          | FALLIFWGFG | LTKYRS | NRTNKRIALLVAGLV   |
| Ords_kangaroo_rat               | REGETVVEVKYRV | VSWSFSPN                  | ELIVIP          | FALLIFWGFG | LTKYRS | NRTNKRIALLVAGLV   |
| Horse                           | REGETVVEVKYRV | VSWSFK                    | ELIVIP          | FALLIFWGFG | LTKYRS | SDTKKRIALLVAGLV   |
| Western_European_hedgehog       | REGETVVEVKYRT | VPWSFSPN                  | ELIVIP          | FALLIFWGFG | LTKYRS | NQTKKRIALLVAGLL   |
| Cat                             | REGETVVEVKYRI | VSWSFSPN                  | ELIVIP          | FALLIFWGFG | LTKYRS | SLMKKRIALLVAGLV   |
| Weddell_seal                    | REGETVVEVKYRI | VSWSFSPN                  | ELIVIP          | FALLIFWGFG | LTKYRS | SLMKKRIALLVAGLV   |
| Dog                             | REGETVVEVKYRI | VSWSFSPN                  | ELIVIP          | FALLIFWGFG | LTKYRS | SIMKKRIALLVAGLV   |
| Red_fox                         | REGETVVEVKYRI | VSWSFSPN                  | ELIVIP          | FALLIFWGFG | LTKYRS | SIMKKRIALLVAGLV   |
| Hawaiian_monk_seal              | REGETVVEVKYRI | VSWSFSPN                  | ELIVIP          | FALLIFWGFG | LTKYRS | SLVKKRIALLVAGLV   |
| American_black_bear             | REGETVVEVKYRI | VSWSFSPN                  | ELIVIP          | FALLIFWGFG | LTKYRS | SLVKKRIALLVAGLV   |
| Grizzly_bear                    | REGETVVEVKYRI | VSWSFSPN                  | ELIVIP          | FALLIFWGFG | LTKYRS | SLVKKRIALLVAGLV   |
| Northern_fur_seal               | REGETVVEVKYRI | VSWSFSPN                  | ELIVIP          | FALLIFWGFG | LTKYRS | SLVKKRIALLVAGLV   |
| Pacific_walrus                  | REGETVVEVKYRI | VSWSFSPN                  | ELIVIP          | FALLIFWGFG | LTKYRS | SLVKKRIALLVAGLV   |
| Giant_panda                     | REGETVVEVKYRI | VSWSFSPN                  | ELIVIP          | FALLIFWGFG | LTKYRS | SLVKKRIALLVAGLV   |
| Polar_bear                      | REGETVVEVKYRI | VSWSFSPN                  | ELIVIP          | FALLIFWGFG | LTKYRS | SLVKKRIALLVAGLV   |
| European_domestic_ferret        | REGETVVEVKYRI | VSWSFSPN                  | ELIVIP          | FALLIFWGFG | LTKYRS | SLVKKRIALLVAGLV   |
| Sea_otter                       | REGETVVEVKYRI | VSWSFSPN                  | ELIVIP          | FALLIFWGFG | LTKYRS | SLVKKRIALLVAGLV   |
| Little_brown_bat                | REGETVVEVKYRV | VSWSFSPN                  | ELIVIP          | FALLIFWGFG | LTKYRS | NASVTKKRIALLVAGLV |
| Hybrid_cattle                   | REGETVVEVKYRV | VSWSFSPN                  | ELIVIP          | FALLIFWGFG | LTKYRS | NYTKKRIALLVAGLV   |
| Cow                             | REGETVVEVKYRV | VSWSFSPN                  | ELIVIP          | FALLIFWGFG | LTKYRS | NYTKKRIALLVAGLV   |
| Sheep                           | REGETVVEVKYRV | VSWSFSPN                  | ELIVIP          | FALLIFWGFG | LTKYRS | NYTKKRIALLVAGLV   |
| Goat                            | REGETVVEVKYRV | VSWSFSPN                  | ELIVIP          | FALLIFWGFG | LTKYRS | NYTKKRIALLVAGLV   |
| Pig                             | REGETVVEVKRRF | VSWSFSPN                  | ELIVIP          | FALLIFWGFG | LTKYRS | SYTKKRIALLVAGLM   |
| Atlantic_bottle-nosed_dolphin   | REGETVVEVKYRV | VSWSFSPN                  | ELIVIP          | FALLIFWGFG | LTKYRS | SYTKKRIALLVAGLV   |
| Yangtze_finless_porpoise        | REGETVVEVKYRV | VSWSFSPN                  | ELIVIP          | FALLIFWGFG | LTKYRS | SYTKKRIALLVAGLV   |
| Yangtze_river_dolphin           | REGETVVEVKYRV | VSWSFSPN                  | ELIVIP          | FALLIFWGFG | LTKYRS | SYTKKRIALLVAGLV   |
| Beluga_whale                    | REGETVVEVKYRV | VSWSFSPN                  | ELIVIP          | FALLIFWGFG | LTKYRS | SYTKKRIALLVAGLV   |
| North_pacific_minke_whale       | REGETVVEVKYRV | VSWSFSPN                  | ELIVIP          | FALLIFWGFG | LTKYRS | SYTKKRIALLVAGLV   |
| Sperm_whale                     | REGETVVEVKYRV | VSWSFSPN                  | ELIVIP          | FALLIFWGFG | LTKYRS | SYTKKRIALLVAGLV   |
| Duckbill                        | REGETVVEVKYRV | VSWSFSPN                  | ELIVIP          | FALLIFWGFG | LTKYRS | SYTKKRIALLVAGLV   |
| Common                          | REGETVVEVKYRV | VSWSFSPN                  | ELIVIP          | FALLIFWGFG | LTKYRS | SYTKKRIALLVAGLV   |
| Tasmanian                       | REGETVVEVKYRV | VSWSFSPN                  | ELIVIP          | FALLIFWGFG | LTKYRS | SYTKKRIALLVAGLV   |
| Indian_muntjac                  | REGETVVEVKYRV | VSWSFSPN                  | ELIVIP          | FALLIFWGFG | LTKYRS | SYTKKRIALLVAGLV   |
| Reeves_muntjac                  | REGETVVEVKYRV | VSWSFSPN                  | ELIVIP          | FALLIFWGFG | LTKYRS | SYTKKRIALLVAGLV   |
| Domestic_yak                    | REGETVVEVKYRV | VSWSFSPN                  | ELIVIP          | FALLIFWGFG | LTKYRS | SYTKKRIALLVAGLV   |
| Spotted_hyena                   | REGETVVEVKYRI | VSWSFSPN                  | ELIVIP          | FALLIFWGFG | LTKYRS | SLMKKRIALLVAGLV   |
| Iberian_lynx                    | REGETVVEVKYRI | VSWSFSPN                  | ELIVIP          | FALLIFWGFG | LTKYRS | SLMKKRIALLVAGLV   |
| Meerkat                         | REGETVVEVKYRI | VSWSFSPN                  | ELIVIP          | FALLIFWGFG | LTKYRS | SLMKKRIALLVAGLV   |
| Canada_lynx                     | REGETVVEVKYRI | VSWSFSPN                  | ELIVIP          | FALLIFWGFG | LTKYRS | SLMKKRIALLVAGLV   |
| Greater_horseshoe_bat           | REGDTVVEVKYRL | VSWSFSPN                  | ELIVIP          | FALLIFWGFG | LTKYRS | SIMKKRIALLVAGLV   |
| Groundhog                       | REGETVVEVKYRV | VSWSFSPN                  | ELIVIP          | FALLIFWGFG | LTKYRS | NCTNMKIIALLVAGLV  |
| West_Indian_manatee             | REGETVVEVKYRV | VSWSFK                    | ELIVIP          | FALLIFWGFG | LTKYRS | DPMKGGKRIALLVAGLV |
| American_mink                   | REGETVVEVKYRI | VSWSFSPN                  | ELIVIP          | FALLIFWGFG | LTKYRS | SLVKKRIALLVAGLV   |
| European_rabbit                 | REGETVVEVKYRV | VSWSFSPN                  | ELIVIP          | FALLIFWGFG | LTKYRS | NRTNKRIALLVAGLV   |
| consensus>70                    | REGETVVEVKYRV | vsWfSpnEnILi!             | Fpi.AiLL.WGqFGi | tlky.s     | ....   | ekti.l.v.gl       |

|                                 | 170                 | 180  | 190    | 200  | 210 | 220     | 230 | 240 | 250                                                      |
|---------------------------------|---------------------|------|--------|------|-----|---------|-----|-----|----------------------------------------------------------|
| CD47_HUMAN                      | ITVIVIVGAILFVPPGEYS | LKNA | TGGL   | YTS  | G   | LI      | LI  | LI  | LI                                                       |
| Northern_greater_galago         | VTIIIVGAILFVPPGEYS  | VKNA | TGGL   | YTS  | G   | LI      | LI  | LI  | LI                                                       |
| Coquerels_sifaka                | TAVIIVGAILFVPPGEYS  | VKNA | TGGL   | YTS  | G   | LI      | LI  | LI  | LI                                                       |
| Common_marmoset                 | ITVIVIVGAILFVPPGEYS | LKNA | TGGL   | YTS  | G   | LI      | LI  | LI  | LI                                                       |
| Black-capped_squirrel_monkey    | ITVIVIVGAILFVPPGEYS | LKNA | TGGL   | YTS  | G   | LI      | LI  | LI  | LI                                                       |
| Panamanian_white-faced_capuchin | ITVIVIVGAILFVPPGEYS | LKNA | TGGL   | YTS  | G   | LI      | LI  | LI  | LI                                                       |
| Nancy_Mas_night_monkey          | ITVIVIVGAILFVPPGEYS | LKNA | TGGL   | YTS  | G   | LI      | LI  | LI  | LI                                                       |
| Black_snub-nosed_monkey         | ITVIVIVGAILFVPPGEYS | LKNA | TGGL   | YTS  | G   | LI      | LI  | LI  | LI                                                       |
| Golden_snub-nosed_monkey        | ITVIVIVGAILFVPPGEYS | LKNA | TGGL   | YTS  | G   | LI      | LI  | LI  | LI                                                       |
| Angolan_Colobus                 | ITVIVIVGAILFVPPGEYS | LKNA | TGGL   | YTS  | G   | LI      | LI  | LI  | LI                                                       |
| Rhesus_macaque                  | ITVIVIVGAILFVPPGEYS | LKNA | TGGL   | YTS  | G   | LI      | LI  | LI  | LI                                                       |
| Green_monkey                    | ITVIVIVGAILFVPPGEYS | LKNA | TGGL   | YTS  | G   | LI      | LI  | LI  | LI                                                       |
| Sooty_mangabey                  | ITVIVIVGAILFVPPGEYS | LKNA | TGGL   | YTS  | G   | LI      | LI  | LI  | LI                                                       |
| Olive_baboon                    | ITVIVIVGAILFVPPGEYS | LKNA | TGGL   | YTS  | G   | LI      | LI  | LI  | LI                                                       |
| Crab-eating_macaque             | ITVIVIVGAILFVPPGEYS | LKNA | TGGL   | YTS  | G   | LI      | LI  | LI  | LI                                                       |
| Southern_pig-tailed_macaque     | ITVIVIVGAILFVPPGEYS | LKNA | TGGL   | YTS  | G   | LI      | LI  | LI  | LI                                                       |
| Drill                           | ITVIVIVGAILFVPPGEYS | LKNA | TGGL   | YTS  | G   | LI      | LI  | LI  | LI                                                       |
| Northern_white-cheeked_gibbon   | ITVIVIVGAILFVPPGEYS | LKNA | TGGL   | YTS  | G   | LI      | LI  | LI  | LI                                                       |
| Sumatran_orangutan              | ITVIVIVGAILFVPPGEYS | LKNA | TGGL   | YTS  | G   | LI      | LI  | LI  | LI                                                       |
| Western_gorilla                 | ITVIVIVGAILFVPPGEYS | LKNA | TGGL   | YTS  | G   | LI      | LI  | LI  | LI                                                       |
| Chimpanzee                      | VTVIVIVGAILFVPPGEYS | LKNA | TGGL   | YTS  | G   | LI      | LI  | LI  | LI                                                       |
| Bonobo                          | VTVIVIVGAILFVPPGEYS | LKNA | TGGL   | YTS  | G   | LI      | LI  | LI  | LI                                                       |
| African_elephant                | LTVMVIVGAILFVPPGEYS | LKNA | TGGL   | YTS  | G   | LI      | LI  | LI  | LI                                                       |
| Golden_hamster                  | LTAVIVVGAAILLIPG    | NPV  | KSA    | ISIG | G   | LI      | LI  | LI  | LI                                                       |
| Mouse                           | LTAVIVVGAAILLIPG    | KPV  | KNA    | ISIG | G   | LI      | LI  | LI  | LI                                                       |
| Rat                             | LTAVIVVGAAILLIPG    | KPV  | KNA    | ISIG | G   | LI      | LI  | LI  | LI                                                       |
| Guinea_pig                      | LTAVIVVGAAILLIPG    | KPV  | KNA    | ISIG | G   | LI      | LI  | LI  | LI                                                       |
| Naked_mole_rat                  | LTAVIVVGAAILLIPG    | KPV  | KNA    | ISIG | G   | LI      | LI  | LI  | LI                                                       |
| American_beaver                 | LTAVIVVGAAILLIPG    | KPV  | KNA    | ISIG | G   | LI      | LI  | LI  | LI                                                       |
| Ords_kangaroo_rat               | LTAVIVVGAAILLIPG    | KPV  | KNA    | ISIG | G   | LI      | LI  | LI  | LI                                                       |
| Horse                           | LTAVIVVGAAILLIPG    | KPV  | KNA    | ISIG | G   | LI      | LI  | LI  | LI                                                       |
| Western_European_hedgehog       | LTAVIVVGAAILLIPG    | KPV  | KNA    | ISIG | G   | LI      | LI  | LI  | LI                                                       |
| Cat                             | LTAVIVVGAAILLIPG    | KPV  | KNA    | ISIG | G   | LI      | LI  | LI  | LI                                                       |
| Weddell_seal                    | LTAVIVVGAAILLIPG    | KPV  | KNA    | ISIG | G   | LI      | LI  | LI  | LI                                                       |
| Dog                             | LTAVIVVGAAILLIPG    | KPV  | KNA    | ISIG | G   | LI      | LI  | LI  | LI                                                       |
| Red_fox                         | LTAVIVVGAAILLIPG    | KPV  | KNA    | ISIG | G   | LI      | LI  | LI  | LI                                                       |
| Hawaiian_monk_seal              | LTAVIVVGAAILLIPG    | KPV  | KNA    | ISIG | G   | LI      | LI  | LI  | LI                                                       |
| American_black_bear             | LTAVIVVGAAILLIPG    | KPV  | KNA    | ISIG | G   | LI      | LI  | LI  | LI                                                       |
| Grizzly_bear                    | LTAVIVVGAAILLIPG    | KPV  | KNA    | ISIG | G   | LI      | LI  | LI  | LI                                                       |
| Northern_fur_seal               | LTAVIVVGAAILLIPG    | KPV  | KNA    | ISIG | G   | LI      | LI  | LI  | LI                                                       |
| Pacific_walrus                  | LTAVIVVGAAILLIPG    | KPV  | KNA    | ISIG | G   | LI      | LI  | LI  | LI                                                       |
| Giant_panda                     | LTAVIVVGAAILLIPG    | KPV  | KNA    | ISIG | G   | LI      | LI  | LI  | LI                                                       |
| Polar_bear                      | LTAVIVVGAAILLIPG    | KPV  | KNA    | ISIG | G   | LI      | LI  | LI  | LI                                                       |
| European_domestic_ferret        | LTAVIVVGAAILLIPG    | KPV  | KNA    | ISIG | G   | LI      | LI  | LI  | LI                                                       |
| Sea_otter                       | LTAVIVVGAAILLIPG    | KPV  | KNA    | ISIG | G   | LI      | LI  | LI  | LI                                                       |
| Little_brown_bat                | LTAVIVVGAAILLIPG    | KPV  | KNA    | ISIG | G   | LI      | LI  | LI  | LI                                                       |
| Hybrid_cattle                   | LTAVIVVGAAILLIPG    | KPV  | KNA    | ISIG | G   | LI      | LI  | LI  | LI                                                       |
| Cow                             | LTAVIVVGAAILLIPG    | KPV  | KNA    | ISIG | G   | LI      | LI  | LI  | LI                                                       |
| Sheep                           | LTAVIVVGAAILLIPG    | KPV  | KNA    | ISIG | G   | LI      | LI  | LI  | LI                                                       |
| Goat                            | LTAVIVVGAAILLIPG    | KPV  | KNA    | ISIG | G   | LI      | LI  | LI  | LI                                                       |
| Pig                             | LTAVIVVGAAILLIPG    | KPV  | KNA    | ISIG | G   | LI      | LI  | LI  | LI                                                       |
| Atlantic_bottle-nosed_dolphin   | LTAVIVVGAAILLIPG    | KPV  | KNA    | ISIG | G   | LI      | LI  | LI  | LI                                                       |
| Yangtze_finless_porpoise        | LTAVIVVGAAILLIPG    | KPV  | KNA    | ISIG | G   | LI      | LI  | LI  | LI                                                       |
| Yangtze_river_dolphin           | LTAVIVVGAAILLIPG    | KPV  | KNA    | ISIG | G   | LI      | LI  | LI  | LI                                                       |
| Beluga_whale                    | LTAVIVVGAAILLIPG    | KPV  | KNA    | ISIG | G   | LI      | LI  | LI  | LI                                                       |
| North_pacific_minke_whale       | LTAVIVVGAAILLIPG    | KPV  | KNA    | ISIG | G   | LI      | LI  | LI  | LI                                                       |
| Sperm_whale                     | LTAVIVVGAAILLIPG    | KPV  | KNA    | ISIG | G   | LI      | LI  | LI  | LI                                                       |
| Duckbill                        | LTAVIVVGAAILLIPG    | KPV  | KNA    | ISIG | G   | LI      | LI  | LI  | LI                                                       |
| Common                          | LTAVIVVGAAILLIPG    | KPV  | KNA    | ISIG | G   | LI      | LI  | LI  | LI                                                       |
| Tasmanian                       | LTAVIVVGAAILLIPG    | KPV  | KNA    | ISIG | G   | LI      | LI  | LI  | LI                                                       |
| Indian_muntjac                  | LTAVIVVGAAILLIPG    | KPV  | KNA    | ISIG | G   | LI      | LI  | LI  | LI                                                       |
| Reeves_muntjac                  | LTAVIVVGAAILLIPG    | KPV  | KNA    | ISIG | G   | LI      | LI  | LI  | LI                                                       |
| Domestic_yak                    | LTAVIVVGAAILLIPG    | KPV  | KNA    | ISIG | G   | LI      | LI  | LI  | LI                                                       |
| Spotted_hyena                   | LTAVIVVGAAILLIPG    | KPV  | KNA    | ISIG | G   | LI      | LI  | LI  | LI                                                       |
| Iberian_lynx                    | LTAVIVVGAAILLIPG    | KPV  | KNA    | ISIG | G   | LI      | LI  | LI  | LI                                                       |
| Meerkat                         | LTAVIVVGAAILLIPG    | KPV  | KNA    | ISIG | G   | LI      | LI  | LI  | LI                                                       |
| Canada_lynx                     | LTAVIVVGAAILLIPG    | KPV  | KNA    | ISIG | G   | LI      | LI  | LI  | LI                                                       |
| Greater_horseshoe_bat           | LTAVIVVGAAILLIPG    | KPV  | KNA    | ISIG | G   | LI      | LI  | LI  | LI                                                       |
| Groundhog                       | LTAVIVVGAAILLIPG    | KPV  | KNA    | ISIG | G   | LI      | LI  | LI  | LI                                                       |
| West_Indian_manatee             | LTAVIVVGAAILLIPG    | KPV  | KNA    | ISIG | G   | LI      | LI  | LI  | LI                                                       |
| American_mink                   | LTAVIVVGAAILLIPG    | KPV  | KNA    | ISIG | G   | LI      | LI  | LI  | LI                                                       |
| European_rabbit                 | LTAVIVVGAAILLIPG    | KPV  | KNA    | ISIG | G   | LI      | LI  | LI  | LI                                                       |
| consensus>70                    | .tiivivgailfvppgeys | .kna | .GLGLi | .v   | .t  | .iLiLiL | .Y  | .vf | . . . . . gm . f . !aLi.Qv1.yv1.vvG1sLCv . . C.p.hGPl\$I |



|                                 |                    |
|---------------------------------|--------------------|
| CD47_HUMAN                      | DE                 |
| Northern_greater_galago         | DE                 |
| Coquerels_sifaka                | DE                 |
| Common_marmoset                 | DE                 |
| Black-capped_squirrel_monkey    | DE                 |
| Panamanian_white-faced_capuchin | DE                 |
| Nancy_Mas_night_monkey          | DE                 |
| Black_snub-nosed_monkey         | DGKYKLHLIIIDQLKHGH |
| Golden_snub-nosed_monkey        | DE                 |
| Angolan_Colobus                 | DE                 |
| Rhesus_macaque                  | S                  |
| Green_monkey                    | DE                 |
| Sooty_mangabey                  | E                  |
| Olive_baboon                    | DE                 |
| Crab-eating_macaque             | DE                 |
| Southern_pig-tailed_macaque     | DE                 |
| Drill                           | DE                 |
| Northern_white-cheeked_gibbon   | DE                 |
| Sumatran_orangutan              | DE                 |
| Western_gorilla                 | DE                 |
| Chimpanzee                      | DE                 |
| Bonobo                          | DE                 |
| African_elephant                | K                  |
| Golden_hamster                  | DE                 |
| Mouse                           | R                  |
| Rat                             | N                  |
| Guinea_pig                      | EE                 |
| Naked_mole_rat                  | EE                 |
| American_beaver                 | DE                 |
| Ords_kangaroo_rat               | DE                 |
| Horse                           | DAARCSRCVCLSN      |
| Western_European_hedgehog       | DE                 |
| Cat                             | N                  |
| Weddell_seal                    | L                  |
| Dog                             | DE                 |
| Red_fox                         | DE                 |
| Hawaiian_monk_seal              | E                  |
| American_black_bear             | DE                 |
| Grizzly_bear                    | DE                 |
| Northern_fur_seal               | DE                 |
| Pacific_walrus                  | DE                 |
| Giant_panda                     | DG                 |
| Polar_bear                      | DE                 |
| European_domestic_ferret        | DE                 |
| Sea_otter                       | DE                 |
| Little_brown_bat                | DE                 |
| Hybrid_cattle                   | N                  |
| Cow                             | N                  |
| Sheep                           | DE                 |
| Goat                            | DE                 |
| Pig                             | DE                 |
| Atlantic_bottle-nosed_dolphin   | DE                 |
| Yangtze_finless_porpoise        | E                  |
| Yangtze_river_dolphin           | DE                 |
| Beluga_whale                    | DGKYKMHQL          |
| North_pacific_minke_whale       | DE                 |
| Sperm_whale                     | DE                 |
| Duckbill                        | DG                 |
| Common                          | DE                 |
| Tasmanian                       | DG                 |
| Indian_muntjac                  | DE                 |
| Reeves_muntjac                  | DE                 |
| Domestic_yak                    | N                  |
| Spotted_hyena                   | DE                 |
| Iberian lynx                    | S                  |
| Meerkat                         | DE                 |
| Canada lynx                     | DE                 |
| Greater_horseshoe_bat           | DE                 |
| Groundhog                       | DE                 |
| West_Indian_manatee             | DGKYTMYLQ F        |
| American_mink                   | DE                 |
| European_rabbit                 | DE                 |
| consensus>70                    | DE                 |
