# Supplementary material for: Structure of the human marker of self 5-transmembrane receptor CD47
Source: PubMed Central journal article supplement (PMC8410850; doi:10.1038/s41467-021-25475-w), 2021-09-01
Supplement: 41467_2021_25475_MOESM5_ESM.pdf [file 41467_2021_25475_MOESM5_ESM.pdf]

|                                 | 130     | 140    | 150  | 160   | 170   | 180   | 190  | 200  | 210   |        |      |       |       |      |       |      |       |     |       |      |     |       |     |     |    |    |    |    |    |   |   |   |   |   |   |   |   |   |   |
|---------------------------------|---------|--------|------|-------|-------|-------|------|------|-------|--------|------|-------|-------|------|-------|------|-------|-----|-------|------|-----|-------|-----|-----|----|----|----|----|----|---|---|---|---|---|---|---|---|---|---|
| CD47_HUMAN                      | IVVFP   | FAILL  | FWGQ | GKTL  | KYRS  | GGMDE | KTAL | LVAG | GLVIT | VIVIVG | ALFV | PGEYS | LKNAT | GLGL | IVTST | GILL | LLHY  | VFS | STAI  |      |     |       |     |     |    |    |    |    |    |   |   |   |   |   |   |   |   |   |   |
| American_chameleon              | IIATV   | VAAVLY | FSSV | VVAMR | FDMT  | LSKK  | GLFL | ELVI | LVIT  | FLAVIG | VLLP | PAGY  | ESSQO | GLAL | IVVPA | FILV | PLHF  | LF  | TSVFE |      |     |       |     |     |    |    |    |    |    |   |   |   |   |   |   |   |   |   |   |
| King_cobra                      | IIISIV  | LIVILY | WCOE | ITVA  | QKFD  | MT    | FKKK | GFTV | TGLL  | IFAVIG | TLLY | AGGE  | YTSV  | KT   | GLIV  | IPAI | IVVPL | FL  | TSVFE |      |     |       |     |     |    |    |    |    |    |   |   |   |   |   |   |   |   |   |   |
| Chinese_softshell_turtle        | IIFFLV  | LAILS  | YWHI | GITV  | SKFET | A     | FWKK | LLFG | GVVIT | VVALIG | FLLP | PGG   | PKNA  | GLS  | LIVL  | SVIL | VPLQ  | FL  | LOKVS |      |     |       |     |     |    |    |    |    |    |   |   |   |   |   |   |   |   |   |   |
| Agassiz_desert_tortoise         | IIILFMV | LAILFY | WIOA | ITV   | SKFET | T     | L    | LK   | SFLA  | IGVV   | IT   | VFAV  | FSL   | ISDE | KPEN  | OT   | GLGL  | IVL | PAVIL | VPSQ | FL  | LOKVS |     |     |    |    |    |    |    |   |   |   |   |   |   |   |   |   |   |
| Chicken                         | IAVLLF  | FIIIL  | QWAO | GVI   | AL    | KCET  | V    | RK   | KKH   | ITR    | CS   | FT    | VVAIV | AV   | LF    | QD   | GS    | ISM | NO    | GL   | AFT | IL    | PAG | IL  | MV | LQ | SI | FK | NV | L |   |   |   |   |   |   |   |   |   |
| Northern_mallard                | ISVLLF  | LIVVF  | WAOI | GVI   | AL    | KCET  | V    | HKN  | KY    | VAV    | CA   | FT    | VLAIV | AV   | LF    | QD   | GS    | ISM | NO    | GL   | FV  | LV    | PA  | VIL | MV | LQ | SI | FK | NV | L |   |   |   |   |   |   |   |   |   |
| American_alligator              | IIILFL  | LAI    | FWAO | CV    | GS    | KFE   | IG   | L    | G     | K      | GL   | I     | T     | G    | S     | I    | I     | I   | A     | G    | V   | V     | A   | L   | L  | V  | P  | D  | G  | Y | T | A | O | N |   |   |   |   |   |
| Band_tailed_pigeon              | IIIVLL  | LVIIF  | CSAO | FS    | I     | AL    | KYE  | I    | E     | P      | Q    | K     | T     | G    | I     | V    | G     | V   | F     | I    | V   | A     | A   | V   | G  | T  | L  | F  | A  | O | D | G | Y | T | A | O |   |   |   |
| Rock_dove                       | IIIVLL  | LVIIF  | CSAO | FS    | I     | AL    | KYE  | I    | E     | P      | Q    | K     | T     | G    | I     | V    | G     | V   | F     | I    | V   | A     | A   | V   | G  | T  | L  | F  | A  | O | D | G | Y | T | A | O |   |   |   |
| Collared_flycatcher             | IVSLVI  | LLVIL  | CAAO | TF    | I     | G     | L    | K    | Y     | E      | I    | E     | S     | Q    | R     | K    | V     | C   | I     | V    | A   | L     | V   | F   | A  | V  | A  | V  | G  | T | L | F | A | O | D | G | Y | T |   |
| Bengalese_finch                 | IVSLMC  | LLVIL  | CAAO | TF    | I     | G     | L    | K    | Y     | E      | I    | E     | S     | Q    | R     | K    | V     | C   | I     | V    | A   | L     | V   | F   | A  | V  | A  | V  | G  | T | L | F | A | O | D | G | Y | T |   |
| Zebra_finch                     | IVSLMC  | LLVIL  | CAAO | TF    | I     | G     | L    | K    | Y     | E      | I    | E     | S     | Q    | R     | K    | V     | C   | I     | V    | A   | L     | V   | F   | A  | V  | A  | V  | G  | T | L | F | A | O | D | G | Y | T |   |
| Burrowing_owl                   | IIALVF  | LVIIL  | CSAO | FS    | I     | AL    | KYE  | I    | E     | P      | Q    | K     | T     | G    | I     | V    | G     | V   | F     | I    | V   | A     | A   | V   | G  | T  | L  | F  | A  | O | D | G | Y | T | A | O |   |   |   |
| Bar-tailed_godwit               | IIALVF  | LVIIL  | CSAO | FS    | I     | AL    | KYE  | I    | E     | P      | Q    | K     | T     | G    | I     | V    | G     | V   | F     | I    | V   | A     | A   | V   | G  | T  | L  | F  | A  | O | D | G | Y | T | A | O |   |   |   |
| Golden_eagle                    | IIALLF  | LVIIL  | CSAO | FS    | I     | AL    | KYE  | I    | E     | P      | Q    | K     | T     | G    | I     | V    | G     | V   | F     | I    | V   | A     | A   | V   | G  | T  | L  | F  | A  | O | D | G | Y | T | A | O |   |   |   |
| Kakapo                          | IIALLF  | LVIIL  | CSAO | FS    | I     | AL    | KYE  | I    | E     | P      | Q    | K     | T     | G    | I     | V    | G     | V   | F     | I    | V   | A     | A   | V   | G  | T  | L  | F  | A  | O | D | G | Y | T | A | O |   |   |   |
| Northern_Bobwhite               | IIALLF  | LVIIL  | CSAO | FS    | I     | AL    | KYE  | I    | E     | P      | Q    | K     | T     | G    | I     | V    | G     | V   | F     | I    | V   | A     | A   | V   | G  | T  | L  | F  | A  | O | D | G | Y | T | A | O |   |   |   |
| Barn_swallow                    | IIALLF  | LVIIL  | CSAO | FS    | I     | AL    | KYE  | I    | E     | P      | Q    | K     | T     | G    | I     | V    | G     | V   | F     | I    | V   | A     | A   | V   | G  | T  | L  | F  | A  | O | D | G | Y | T | A | O |   |   |   |
| Ring-necked_pheasant            | IIALLF  | LVIIL  | CSAO | FS    | I     | AL    | KYE  | I    | E     | P      | Q    | K     | T     | G    | I     | V    | G     | V   | F     | I    | V   | A     | A   | V   | G  | T  | L  | F  | A  | O | D | G | Y | T | A | O |   |   |   |
| Common_box_turtle               | IIISMV  | LAILFY | WIOA | ITV   | SKFET | A     | L    | L    | K     | S      | F    | L     | A     | G    | G     | C    | T     | S   | V     | R    | T   | I     | F   | A   | V  | I  | G  | T  | L  | L | I | S | D | D | K | P | E |   |   |
| Big-headed_turtle               | IIISMV  | LAILFY | WIOA | ITV   | SKFET | A     | L    | L    | K     | S      | F    | L     | A     | G    | G     | C    | T     | S   | V     | R    | T   | I     | F   | A   | V  | I  | G  | T  | L  | L | I | S | D | D | K | P | E |   |   |
| Eastern_brown_snake             | IIISIV  | LIVILY | WCOE | ITVA  | QKFD  | M     | F    | E    | K     | K      | G    | F     | T     | G    | L     | L    | I     | S   | I     | F    | A   | V     | I   | G   | T  | L  | L  | I  | S  | D | D | K | P | E | N | O |   |   |   |
| Eastern_diamondback_rattlesnake | IIISII  | LIVILY | WCOE | ITVA  | QKFD  | M     | F    | E    | K     | K      | G    | F     | T     | G    | L     | L    | I     | S   | I     | F    | A   | V     | I   | G   | T  | L  | L  | I  | S  | D | D | K | P | E | N | O |   |   |   |
| South_American_coral_snake      | IIISIV  | LIVILY | WCOE | ITVA  | QKFD  | M     | F    | E    | K     | K      | G    | F     | T     | G    | L     | L    | I     | S   | I     | F    | A   | V     | I   | G   | T  | L  | L  | I  | S  | D | D | K | P | E | N | O |   |   |   |
| Brown_tree_snake                | IIISII  | LIVILY | WCOE | ITVA  | QKFD  | M     | F    | E    | K     | K      | G    | F     | T     | G    | L     | L    | I     | S   | I     | F    | A   | V     | I   | G   | T  | L  | L  | I  | S  | D | D | K | P | E | N | O |   |   |   |
| MacQueens_bustard               | IIITLF  | SVIIL  | CAAO | SV    | I     | A     | L    | K    | Y     | E      | I    | E     | T     | Q    | K     | K    | S     | L   | I     | V    | A   | G     | I   | F   | I  | T  | A  | A  | V  | G | T | L | F | A | O | D | G | Y |   |
| Cuckoo_roller                   | IIALLF  | LVIIL  | CSAO | FS    | I     | AL    | KYE  | I    | E     | P      | Q    | K     | T     | G    | I     | V    | G     | V   | F     | I    | V   | A     | A   | V   | G  | T  | L  | F  | A  | O | D | G | Y | T | A | O |   |   |   |
| Hoatzin                         | IIALLF  | LVIIL  | CSAO | FS    | I     | AL    | KYE  | I    | E     | P      | Q    | K     | T     | G    | I     | V    | G     | V   | F     | I    | V   | A     | A   | V   | G  | T  | L  | F  | A  | O | D | G | Y | T | A | O |   |   |   |
| Adelie_penguin                  | IIALLF  | LVIIL  | CSAO | FS    | I     | AL    | KYE  | I    | E     | P      | Q    | K     | T     | G    | I     | V    | G     | V   | F     | I    | V   | A     | A   | V   | G  | T  | L  | F  | A  | O | D | G | Y | T | A | O |   |   |   |
| Speckled_mousebird              | IIALLF  | LVIIL  | CSAO | FS    | I     | AL    | KYE  | I    | E     | P      | Q    | K     | T     | G    | I     | V    | G     | V   | F     | I    | V   | A     | A   | V   | G  | T  | L  | F  | A  | O | D | G | Y | T | A | O |   |   |   |
| Golden-collared_manakin         | IIALLF  | LVIIL  | CSAO | FS    | I     | AL    | KYE  | I    | E     | P      | Q    | K     | T     | G    | I     | V    | G     | V   | F     | I    | V   | A     | A   | V   | G  | T  | L  | F  | A  | O | D | G | Y | T | A | O |   |   |   |
| White-throated_tinamou          | IIIVLL  | LAI    | FWAO | CV    | GS    | KFE   | IG   | L    | G     | K      | Y    | E     | I     | E    | S     | Q    | R     | K   | V     | C    | I   | V     | A   | L   | V  | F  | A  | V  | A  | V | G | T | L | F | A | O | D | G | Y |
| Red-throated_loon               | IIALLF  | LVIIL  | CSAO | FS    | I     | AL    | KYE  | I    | E     | P      | Q    | K     | T     | G    | I     | V    | G     | V   | F     | I    | V   | A     | A   | V   | G  | T  | L  | F  | A  | O | D | G | Y | T | A | O |   |   |   |
| Red-crested_turaco              | IIALLF  | LVIIL  | CSAO | FS    | I     | AL    | KYE  | I    | E     | P      | Q    | K     | T     | G    | I     | V    | G     | V   | F     | I    | V   | A     | A   | V   | G  | T  | L  | F  | A  | O | D | G | Y | T | A | O |   |   |   |
| Great_crested_grebe             | IIIVLL  | LAI    | FWAO | CV    | GS    | KFE   | IG   | L    | G     | K      | Y    | E     | I     | E    | S     | Q    | R     | K   | V     | C    | I   | V     | A   | L   | V  | F  | A  | V  | A  | V | G | T | L | F | A | O | D | G |   |
| Northern_carmine_bee-eater      | IIALLF  | LVIIL  | CSAO | FS    | I     | AL    | KYE  | I    | E     | P      | Q    | K     | T     | G    | I     | V    | G     | V   | F     | I    | V   | A     | A   | V   | G  | T  | L  | F  | A  | O | D | G | Y | T | A | O |   |   |   |
| Northern_fulmar                 | IIALLF  | LVIIL  | CSAO | FS    | I     | AL    | KYE  | I    | E     | P      | Q    | K     | T     | G    | I     | V    | G     | V   | F     | I    | V   | A     | A   | V   | G  | T  | L  | F  | A  | O | D | G | Y | T | A | O |   |   |   |
| Emperor_penguin                 | IIALLF  | LVIIL  | CSAO | FS    | I     | AL    | KYE  | I    | E     | P      | Q    | K     | T     | G    | I     | V    | G     | V   | F     | I    | V   | A     | A   | V   | G  | T  | L  | F  | A  | O | D | G | Y | T | A | O |   |   |   |
| White-tailed_eagle              | IIALLF  | LVIIL  | CSAO | FS    | I     | AL    | KYE  | I    | E     | P      | Q    | K     | T     | G    | I     | V    | G     | V   | F     | I    | V   | A     | A   | V   | G  | T  | L  | F  | A  | O | D | G | Y | T | A | O |   |   |   |
| Dalmatian_pelican               | IIALLF  | LVIIL  | CSAO | FS    | I     | AL    | KYE  | I    | E     | P      | Q    | K     | T     | G    | I     | V    | G     | V   | F     | I    | V   | A     | A   | V   | G  | T  | L  | F  | A  | O | D | G | Y | T | A | O |   |   |   |
| Grey_crowned_crane              | IIIVLL  | SVVIL  | CAAO | SV    | I     | A     | L    | K    | Y     | E      | I    | E     | T     | Q    | K     | K    | S     | L   | I     | V    | A   | G     | I   | F   | I  | T  | A  | A  | V  | G | T | L | F | A | O | D | G |   |   |
| Common_cuckoo                   | IIIVLL  | SVVIL  | CAAO | SV    | I     | A     | L    | K    | Y     | E      | I    | E     | T     | Q    | K     | K    | S     | L   | I     | V    | A   | G     | I   | F   | I  | T  | A  | A  | V  | G | T | L | F | A | O | D | G |   |   |
| Sunbittern                      | IIIVLL  | SVVIL  | CAAO | SV    | I     | A     | L    | K    | Y     | E      | I    | E     | T     | Q    | K     | K    | S     | L   | I     | V    | A   | G     | I   | F   | I  | T  | A  | A  | V  | G | T | L | F | A | O | D | G |   |   |
| American_crow                   | IIISLM  | LLVIL  | CAAO | SV    | I     | A     | L    | K    | Y     | E      | I    | E     | T     | Q    | K     | K    | S     | L   | I     | V    | A   | G     | I   | F   | I  | T  | A  | A  | V  | G | T | L | F | A | O | D | G |   |   |
| Brown_mesite                    | IIALLS  | SVIIL  | CAAO | SV    | I     | A     | L    | K    | Y     | E      | I    | E     | T     | Q    | K     | K    | S     | L   | I     | V    | A   | G     | I   | F   | I  | T  | A  | A  | V  | G | T | L | F | A | O | D | G |   |   |
| Barn_owl                        | IIALLF  | LVIIL  | CSAO | FS    | I     | AL    | KYE  | I    | E     | P      | Q    | K     | T     | G    | I     | V    | G     | V   | F     | I    | V   | A     | A   | V   | G  | T  | L  | F  | A  | O | D | G | Y | T | A | O |   |   |   |
| American_flamingo               | IIIVLL  | LVIIF  | CSAO | FS    | I     | AL    | KYE  | I    | E     | P      | Q    | K     | T     | G    | I     | V    | G     | V   | F     | I    | V   | A     | A   | V   | G  | T  | L  | F  | A  | O | D | G | Y | T | A | O |   |   |   |
| Annas_hummingbird               | IIIVLL  | LVIIF  | CSAO | FS    | I     | AL    | KYE  | I    | E     | P      | Q    | K     | T     | G    | I     | V    | G     | V   | F     | I    | V   | A     | A   | V   | G  | T  | L  | F  | A  | O | D | G | Y | T | A | O |   |   |   |
| Red-legged seriema              | IIALLF  | LVIIL  | CSAO | FS    | I     | AL    | KYE  | I    | E     | P      | Q    | K     | T     | G    | I     | V    | G     | V   | F     | I    | V   | A     | A   | V   | G  | T  | L  | F  | A  | O | D | G | Y | T | A | O |   |   |   |
| Gouldian_finch                  | VVSLMC  | LLVIL  | CAAO | SV    | I     | A     | L    | K    | Y     | E      | I    | E     | T     | Q    | K     | K    | S     | L   | I     | V    | A   | G     | I   | F   | I  | T  | A  | A  | V  | G | T |   |   |   |   |   |   |   |   |

|                                 | 220 | 230 | 240 | 250 | 260 | 270 |   |   |   |   |   |   |   |   |   |   |   |   |   |   |   |   |   |   |   |   |   |   |   |   |   |   |   |   |   |   |   |   |   |   |   |   |   |   |   |   |   |   |   |   |   |   |   |   |   |   |   |   |   |
|---------------------------------|-----|-----|-----|-----|-----|-----|---|---|---|---|---|---|---|---|---|---|---|---|---|---|---|---|---|---|---|---|---|---|---|---|---|---|---|---|---|---|---|---|---|---|---|---|---|---|---|---|---|---|---|---|---|---|---|---|---|---|---|---|---|
| CD47_HUMAN                      | G   | T   | S   | F   | V   | I   | A | I | V | I | Q | V | I | A | I | V | V | G | L | S | L | C | I | A | A | C | I | P | M | H | G | P | L | L | I | S | G | L | S | I | L | A | L | A | Q | L | L | G | L | V | Y | M | K | F | V | A |   |   |   |
| American_chameleon              | K   | Q   | P   | L   | F   | A   | I | L | V | L | K | A | I | G | Y | I | A | V | A | G | L | C | V | L | A | C | P | K | Q | S | I | M | I | A | G | L | A | I | D | I | V | A | A | I | G | L | T | Y | L | I | V | I | G | G |   |   |   |   |   |
| King_cobra                      | K   | Q   | P   | L   | F   | A   | I | L | V | L | K | A | I | G | Y | I | A | V | A | G | L | C | V | L | A | C | P | K | Q | S | I | M | I | A | G | L | A | I | D | I | V | A | A | I | G | L | T | Y | L | I | V | I | G | G |   |   |   |   |   |
| Chinese_softshell_turtle        | S   | K   | S   | R   | F   | D   | I | F | L | L | V | E | S | L | G | Y | I | A | I | G | A | L | C | I | T | A | C | P | K | N | G | S | V | V | I | I | G | L | V | I | I | A | F | V | E | V | A | G | L | I | L | G | I | V | G |   |   |   |   |
| Agassiz_desert_tortoise         | N   | L   | S   | F   | A   | I   | G | V | V | L | E | S | L | G | Y | I | A | V | I | G | L | C | V | T | A | C | R | P | I | N | G | A | V | V | I | A | G | L | A | I | M | A | L | T | P | V | V | G | L | I | H | A | I | T | R |   |   |   |   |
| Chicken                         | D   | I   | T   | H   | K   | G   | Y | A | L | I | G | F | Q | V | V | G | Y | I | A | V | I | G | A | L | S | V | S | A | C | P | S | V | L | L | S | V | V | I | A | G | L | V | M | A | V | A | D | L | L | A | L | A | Y | V | V | S | C |   |   |
| Northern_mallard                | D   | V   | T   | R   | K   | G   | Y | A | L | I | G | L | Q | S | P | F | V | V | A | L | V | G | A | L | C | S | A | C | P | S | E | L | L | S | V | V | I | A | G | L | V | M | A | F | E | D | L | L | A | L | L | Y | M | V | T | S | C |   |   |
| American_alligator              | N   | H   | S   | P   | S   | A   | V | L | L | K | S | I | G | Y | I | A | V | I | G | A | L | C | V | S | A | C | P | P | A | Q | S | V | V | I | A | G | L | A | I | M | A | S | G | N | L | I | S | L | A | Y | V | F | I | T | G |   |   |   |   |
| Band_tailed_pigeon              | S   | L   | P   | P   | T   | A   | F | V | L | L | F | F | Q | L | G | Y | I | A | V | I | G | A | L | C | V | S | A | C | P | P | L | H | G | S | V | V | I | A | G | L | A | I | M | A | S | A | N | F | I | S | M | A | Y | V | F | I | T | G |   |
| Rock_dove                       | S   | L   | P   | P   | T   | A   | F | V | L | L | F | F | Q | L | G | Y | I | A | V | I | G | A | L | C | V | S | A | C | P | P | L | H | G | S | V | V | I | A | G | L | A | I | M | A | S | A | N | F | I | S | M | A | Y | V | F | I | T | G |   |
| Collared_flycatcher             | S   | Q   | L   | Q   | A   | T   | F | A | L | L | G | L | K | L | G | F | Y | I | A | V | I | G | A | L | C | V | P | A | C | P | P | L | H | G | S | V | L | I | A | G | L | A | I | M | A | I | A | S | L | L | S | L | A | Y | V | F | I | T | G |
| Bengalese_finch                 | S   | L   | R   | A   | T   | L   | A | L | L | G | L | K | L | G | F | Y | I | A | V | I | G | A | L | C | V | S | A | C | P | P | L | H | V | S | V | L | I | A | G | L | A | I | M | A | F | A | S | I | C | S | L | V | Y | V | F | M | G |   |   |
| Zebra_finch                     | S   | L   | R   | A   | T   | L   | A | L | L | G | L | K | L | G | F | Y | I | A | V | I | G | A | L | C | V | S | A | C | P | P | L | H | V | S | V | L | I | A | G | L | A | I | M | A | F | A | S | I | C | S | L | V | Y | V | F | M | G |   |   |
| Burrowing_owl                   | S   | L   | Q   | A   | T   | F   | A | L | L | G | L | Q | L | G | Y | I | A | V | I | G | A | L | C | V | S | A | C | P | P | L | H | G | S | V | V | I | A | G | L | A | I | M | A | I | A | N | L | L | S | L | A | Y | V | F | I | T | G |   |   |
| Bar-tailed_godwit               | N   | L   | P   | Q   | A   | T   | F | V | L | L | G | L | Q | T | G | Y | I | A | V | I | G | A | L | C | V | P | A | C | P | P | I | H | A | S | V | I | A | G | L | A | I | L | A | I | A | Y | L | L | S | L | G | Y | V | F | I | V | E | G |   |
| Golden_eagle                    | S   | L   | Q   | A   | T   | F   | A | L | L | G | L | Q | L | G | Y | I | A | V | I | G | A | L | C | V | S | A | C | P | P | L | H | G | S | V | V | I | A | G | L | A | I | M | A | I | A | N | L | L | S | L | A | Y | V | F | I | T | G |   |   |
| Kakapo                          | S   | L   | Q   | A   | T   | F   | A | L | L | G | L | H | L | G | Y | I | A | V | I | G | A | L | C | V | S | A | C | P | P | L | H | G | S | V | V | I | A | G | L | A | I | M | A | I | A | N | L | L | S | L | A | Y | V | F | I | T | G |   |   |
| Northern_Bobwhite               | D   | I   | T   | H   | K   | G   | Y | A | L | I | G | F | Q | V | V | G | Y | I | A | V | I | G | A | L | S | V | S | A | C | P | S | I | L | L | S | V | V | I | A | G | L | V | M | A | V | A | D | L | L | A | L | A | Y | V | V | S | Y | G |   |
| Barn_swallow                    | S   | L   | Q   | A   | T   | F   | A | L | L | G | L | K | L | G | F | Y | I | A | V | I | G | A | L | C | V | P | A | C | P | P | L | H | G | S | V | L | I | A | G | L | A | I | M | A | I | A | S | L | L | S | L | A | Y | V | F | I | T | G |   |
| Ring-necked_pheasant            | D   | I   | T   | H   | K   | G   | Y | A | L | I | G | F | Q | V | V | G | Y | I | A | V | I | G | A | L | S | V | S | A | C | P | S | V | L | L | S | V | V | I | A | G | L | V | M | A | V | A | D | L | L | A | L | V | Y | V | F | M | G |   |   |
| Common_box_turtle               | N   | N   | L   | L   | F   | A   | I | G | V | V | L | E | S | L | G | Y | I | A | V | I | G | L | C | I | T | A | C | R | P | K | N | G | A | V | V | I | A | G | L | A | I | M | A | L | A | V | G | L | T | Y | A | I | S | G |   |   |   |   |   |
| Big-headed_turtle               | N   | N   | L   | L   | F   | A   | I | G | V | V | L | E | S | L | G | Y | I | A | V | I | G | L | C | I | T | A | C | R | P | K | N | G | A | V | V | I | A | G | L | A | I | M | A | L | A | V | G | L | T | Y | A | I | S | G |   |   |   |   |   |
| Eastern_brown_snake             | K   | Q   | P   | L   | F   | A   | V | L | L | A | K | A | I | G | Y | I | A | V | A | G | A | L | C | V | T | V | C | E | P | K | H | G | S | V | L | I | V | G | L | A | I | I | G | A | V | A | I | G | L | T | Y | I | I | I | G |   |   |   |   |
| Eastern_diamondback_rattlesnake | K   | Q   | P   | L   | F   | A   | V | L | L | A | K | A | I | G | Y | I | A | V | A | G | A | L | C | V | T | A | C | P | K | H | G | S | V | L | I | A | G | L | A | I | I | G | A | V | A | I | G | L | T | Y | I | I | I | G |   |   |   |   |   |
| South_American_coral_snake      | K   | Q   | P   | V   | F   | A   | V | L | L | A | K | A | I | G | Y | I | A | V | A | G | A | L | C | V | T | V | C | E | P | K | H | G | S | V | L | I | A | G | L | A | I | I | G | A | V | A | I | G | L | T | Y | I | I | I | G |   |   |   |   |
| Brown_tree_snake                | K   | Q   | P   | L   | F   | A   | V | L | L | A | K | A | I | G | Y | I | A | V | A | G | A | L | C | V | T | E | C | L | P | K | N | G | A | V | L | I | A | G | L | A | I | I | S | A | V | A | V | I | G | L | T | Y | I | I | I | G |   |   |   |
| MacQueens_bustard               | S   | L   | Q   | A   | T   | F   | A | L | L | G | L | Q | L | G | Y | I | A | V | I | G | A | L | C | S | A | C | P | Q | L | H | G | S | V | V | I | A | G | L | A | I | M | A | I | A | N | L | L | S | L | A | Y | V | F | I | T | G |   |   |   |
| Cuckoo_roller                   | S   | L   | Q   | A   | T   | F   | A | L | L | G | L | Q | L | G | Y | I | A | V | I | G | A | L | C | V | S | A | C | P | P | L | H | G | S | V | V | I | A | G | L | A | I | M | A | I | A | N | L | L | S | L | A | Y | V | F | I | T | G |   |   |
| Hoatzin                         | S   | L   | Q   | A   | T   | F   | A | L | L | G | L | K | L | G | Y | I | A | V | I | G | A | L | C | V | S | A | C | P | P | L | H | G | S | V | V | I | A | G | L | A | I | M | A | I | A | N | L | L | S | L | A | Y | V | F | I | T | G |   |   |
| Adelie_penguin                  | S   | L   | Q   | A   | T   | F   | A | L | L | G | L | K | L | G | Y | I | A | V | I | G | A | L | C | V | S | A | C | P | P | L | H | G | S | V | L | I | A | G | L | A | I | M | A | I | A | N | L | L | S | L | A | Y | V | F | I | T | G |   |   |
| Speckled_mousebird              | S   | L   | Q   | A   | T   | F   | A | L | L | G | L | K | L | G | Y | I | A | V | I | G | A | L | C | V | S | A | C | P | P | L | H | G | S | V | V | I | A | G | L | A | I | M | A | I | A | N | L | L | S | L | A | Y | V | F | I | T | G |   |   |
| Golden-collared_manakin         | S   | L   | P   | H   | T   | L   | A | L | L | G | L | K | L | G | Y | I | A | V | I | G | A | L | C | V | P | A | C | P | P | L | H | A | S | V | L | I | A | G | L | A | I | M | A | I | A | N | L | L | S | L | V | Y | V | F | I | T | G |   |   |
| White-throated_tinamou          | S   | L   | T   | K   | T   | A   | L | L | A | L | E | F | L | G | Y | I | A | V | A | G | A | L | C | V | S | A | C | P | V | L | N | G | S | V | V | I | A | G | L | A | I | M | A | I | A | N | L | L | S | L | V | Y | V | C | F | V | G |   |   |
| Red-throated_loon               | S   | L   | Q   | A   | T   | F   | A | L | L | G | L | Q | L | G | Y | I | A | V | I | G | A | L | C | V | S | A | C | P | P | L | H | G | S | V | V | I | A | G | L | A | I | M | A | I | A | N | L | L | S | L | A | Y | V | F | I | T | G |   |   |
| Red-crested_turaco              | S   | L   | Q   | A   | T   | F   | A | L | L | G | L | Q | L | G | Y | I | A | V | I | G | A | L | C | V | S | A | C | P | P | L | H | G | S | V | M | I | A | G | L | A | I | M | A | I | A | N | L | L | S | L | A | Y | V | F | I | T | G |   |   |
| Great_creted_grebe              | S   | L   | Q   | A   | T   | F   | A | L | L | G | L | Q | L | G | Y | I | A | V | I | G | A | L | C | V | S | A | C | P | P | L | H | G | S | V | V | I | A | G | L | A | I | M | A | V | G | N | L | L | S | L | V | Y | V | F | I | T | G |   |   |
| Northern_carmine_bee-eater      | S   | L   | Q   | A   | T   | F   | A | L | L | G | L | E | L | G | Y | I | A | V | I | G | A | L | C | V | S | A | C | P | P | L | H | G | S | V | L | I | A | G | L | A | I | M | A | I | A | N | L | L | S | L | A | Y | V | F | I | T | G |   |   |
| Northern_fulmar                 | S   | L   | Q   | A   | T   | F   | A | L | L | G | L | E | L | G | Y | I | A | V | I | G | A | L | C | V | S | A | C | P | P | L | H | G | S | V | V | I | A | G | L | A | I | M | A | I | A | N | L | L | S | L | A | Y | V | F | I | T | G |   |   |
| Emperor_penguin                 | S   | L   | Q   | A   | T   | F   | A | L | L | G | L | E | L | G | Y | I | A | V | I | G | A | L | C | V | S | A | C | P | P | L | H | G | S | V | L | I | A | G | L | A | I | M | A | I | A | N | L | L | S | L | A | Y | V | F | I | T | G |   |   |
| White-tailed_eagle              | S   | L   | Q   | A   | T   | F   | A | L | L | G | L | Q | L | G | Y | I | A | V | I | G | A | L | C | V | S | A | C | P | P | L | H | G | S | V | V | I | A | G | L | A | I | M | A | I | A | N | L | L | S | L | A | Y | V | F | I | T | G |   |   |
| Dalmatian_pelican               | N   | L   | Q   | A   | T   | F   | A | L | L | G | L | E | L | G | Y | I | A | V | I | G | A | L | C | V | S | A | C | P | P | L | H | G | S | V | V | I | A | G | L | A | I | M | A | I | A | N | L |   |   |   |   |   |   |   |   |   |   |   |   |

|                                 | 280               | 290     | 300                      |               |
|---------------------------------|-------------------|---------|--------------------------|---------------|
| CD47_HUMAN                      | SNQKTIQP          | RKAVEEP | NAFKESK.G                | MMND...E...   |
| American_chameleon              | SSLRDHQP          | RKAVEES | ND..AK.GV                | MLE           |
| King_cobra                      | SNLKDHP           | RKAVEES | NG...RCTGYEVIESNYGHGNKWR | TFVD...TPWP.. |
| Chinese_softshell_turtle        | SLKAYI.G          | LTPN..  |                          |               |
| Agassiz_desert_tortoise         | SSKKDQ.AS         | TKAVEEP | NG..RW                   |               |
| Chicken                         | SRMKDHP           | RY...   |                          |               |
| Northern_mallard                | SRMKDHP           | RY...   | NE..LK.T                 | ETESTAEMNDG   |
| American_alligator              | SRMKDHP           | RNNL..  |                          |               |
| Band_tailed_pigeon              | SRMKDHP           | RKAVEEP | ND..AK.G                 | VML...E..     |
| Rock_dove                       | SRMKDHP           | GVS.K.L | NI..                     | E..           |
| Collared_flycatcher             | SRMKDHP           | RKAVEEP | ND..AK.G                 | VML...E..     |
| Bengalese_finch                 | SRMKDHP           | RKAVEEP | ND..AK.G                 | VML...E..     |
| Zebra_finch                     | SRMKDHP           | RKAVEEP | ND..AK.G                 | VML...E..     |
| Burrowing_owl                   | SRMKDHP           | RKAVEEP | ND..AK.G                 | VML...E..     |
| Bar-tailed_godwit               | LKSYVIRE          | YTVVDT  | WP                       |               |
| Golden_eagle                    | SRMKDHP           | RKAVEEP | ND..AK.G                 | VML...E..     |
| Kakapo                          | SRMKDHP           | RKAVEEP | ND..AK.G                 | VML...E..     |
| Northern_Bobwhite               | R.IAFAIQ          |         |                          |               |
| Barn_swallow                    | SVELDTGK          | RITHGIK | GRSV                     |               |
| Ring-necked_pheasant            | SRMKDHP           | RKAVEEP | ND..TK.G                 | VML...E..     |
| Common_box_turtle               | YSKKEQ.P          | RKAVEEP | NA..KV.TG                | ESDR..ICYRGDM |
| Big-headed_turtle               | SSKKEQ.H          | RKAVEEP | NG..                     |               |
| Eastern_brown_snake             | SNLKDHP           | RKAVEES | ND..AK.G                 | VMLE          |
| Eastern_diamondback_rattlesnake | SNLKDHP           | RHWM..  |                          |               |
| South_American_coral_snake      | SNLKDHP           | RKAVEES | ND..AK.G                 | VMLE          |
| Brown_tree_snake                | SNLKDHP           | RKAVEES | ND..AK.G                 | VMLE          |
| MacQueens_bustard               | SRMQDHP           | RKAVEEP | N                        |               |
| Cuckoo_roller                   | SRMKDHP           | RKAVEEP | N                        |               |
| Hoatzin                         | SRMKDHP           | RKAVEEP | N                        |               |
| Adelie_penguin                  | SRMKDHP           | RKAVEEP | N                        |               |
| Speckled_mousebird              | SRMKDHP           | RKAVEEP | N                        |               |
| Golden-collared_manakin         | SRMKDHP           | RKAVEEP | N                        |               |
| White-throated_tinamou          | SRMKDHP           | RKAVEEP | N                        |               |
| Red-throated_loon               | SRMKDHP           | RKAVEEP | N                        |               |
| Red-crested_turaco              | SRMKDHP           | RKAVEEP | N                        |               |
| Great_crested_grebe             | SRMKDHP           | RKAVEEP | N                        |               |
| Northern_carmine_bee-eater      | PRMKDHP           | RKAVEEP | N                        |               |
| Northern_fulmar                 | SRVKDHP           | RKAVEEP | N                        |               |
| Emperor_penguin                 | SRMKDHP           | RKAVEEP | N                        |               |
| White-tailed_eagle              | SRMKDHP           | RKAVEEP | N                        |               |
| Dalmatian_pelican               | SRMKDHP           | RKAVEEP | N                        |               |
| Grey_crowned_crane              | SRMKDHP           | RKAVEEP | N                        |               |
| Common_cuckoo                   | SRMKDHP           | RKAVEEP | N                        |               |
| Sunbittern                      | SRMKDHP           | RKAVEEP | N                        |               |
| American_crow                   | SRMKDHP           | RKAVEEP | N                        |               |
| Brown_mesite                    | SRMKDHP           | RKAVEEP | N                        |               |
| Barn_owl                        | SRMKDHP           | RKAVEEP | N                        |               |
| American_flamingo               | SRMKDHP           | RKAVEEP | N                        |               |
| Annas_hummingbird               | SRMKDHP           | RKAVEEP | N                        |               |
| Red-legged_seriema              | SRMKDHP           | RKAVEEP | N                        |               |
| Gouldian_finch                  | SRMKDHP           | RKAVEEP | N                        |               |
| Little_egret                    | SRMKDHP           | RKAVEEP | N                        |               |
| Yellow-throated_sandgrouse      | SRMKDHP           | RKAVEEP | N                        |               |
| Turkey_vulture                  | SRMKDHP           | RKAVEEP | N                        |               |
| Downy_woodpecker                | SRMKDHP           | RKAVEEP | N                        |               |
| Kea                             | SRMKDHP           | RKAVEEP | N                        |               |
| Killdeer                        | SRMKDHP           | RKAVEEP | N                        |               |
| Scaled_quail                    | SRMKDHP           | RKAVEEP | N                        |               |
| Ocelot_gecko                    | SNFKKEHP          | RHVMS.V |                          |               |
| Common_wall_lizard              | TRFKDHP           | RKAVEEP | WT.WK                    | QVE...KDFC..  |
| consensus>70                    | s.mkdh..p.kavee.l |         |                          |               |
