# Supplementary material for: Structure of the human marker of self 5-transmembrane receptor CD47
Source: PubMed Central journal article supplement (PMC8410850; doi:10.1038/s41467-021-25475-w), 2021-09-01
Supplement: 41467_2021_25475_MOESM7_ESM.pdf [file 41467_2021_25475_MOESM7_ESM.pdf]

```

CD47_HUMAN      1      10      20      30      40      50      60      70
Variola_virus  . . . . . Q L F N K T K S V E F T P C N D V V I P C F V T M E A Q N T T E V Y V K W F K G R D Y T F D G A L N K S T V P T D F S S A K I E V S Q
Ectromelia_virus M L R V . . . R I L L I Y L C T F F V I I S T K K T I E Y T A O N D T I I I G C T I D N E . . . . . T K K I R W K L D N H D I L T Y N K P S K T I L S K W H T S S A K L . . . H S
Cowpox_virus     M L R V . . . R I S L I Y L Y T L F V I I T T K K T I E Y T A O N D T I I I G C T I D N E . . . . . T K K I R W K L D N H D I L T Y N K P S K T I L S K W H T S S A R L . . . H S
Monkeypox_virus M L R V . . . R I L L I Y L C T F F V I I S T K K T I E Y T A O N D T I I I G C T I D N E . . . . . T K K I R W K L D N H D I L T Y N K P S K T I L S K W H T S S A R L . . . H S
Akhmeta_virus   M L R V . . . R I S L I Y L Y T L F V I I T T K K T I E Y T A O N D T I I I G C T I D N E . . . . . T K K I R W K L D N H D I L T Y N K P S K T I L S K W H T S S A R L . . . H S
Yokapox_virus  M L . . . . . K L F Y L Y T V T Y I A N S K T I E Y T P O N D T I I I G C Y I S . . . . . T K K I T W K L D N H V I I I Y N K T T S S T M L S K W H K . . . A K L R L
Taterapox_virus M L R V . . . R I L L I Y L C T F F V I I S T K K T I E Y T A O N D T I I I G C T I D N E . . . . . T K K I R W K L D N H D I L T Y N K P S K T I L S K W H T S S A K L . . . H S
Skunkpox_virus M E N S . . . K I L L V I Y F T L F V D I I K T K K T I E Y T A O N D T I I I G C T I D N E . . . . . T K K I R W K L D N H D I L T Y N M P S K T I L S K W H T S A R L . . . H S
Volepox_virus  M H K I T N S K I L L V I Y L T L F D V I V T K K T I E Y T A O N N T V I I I G C T I D N E . . . . . T K K V R W R L D N H D I L Y N R P S K T I L S K W H T S A R L . . . H S
Camelpox_virus M L R V . . . R I L L I Y L C T F F V I I A T K K T I E Y T A O N D T I I I G C T I D N E . . . . . T K K I R W K L D N H D I L T Y N K P S K T I L S K W H T S A K L . . . H S
Horsepox_virus M L R V . . . R I L L I Y L C T F F V I I S T K K T I E Y T A O N N T I I I G C T I D N E . . . . . T K K I R W K L D N H D I L T Y N K P S K T I L S K W H T S A K L . . . H S
Alaskapox_virus M I R . . . . . S I Y I Y M L V M T T T K N I E Y T A O N S I I I I G C T I D N E . . . . . T K K I R W F D N H D I L T Y N K T S K M S I L S K W H T S A K L . . . H S
consensus>70  m . . . . . l i y l . . . . . i . . . t k T ! E % t a C N # t ! ! I P C t ! d N p . . . . . t k Y ! r W k l d n h d I l t % # k t s . k t t i l s k w h t S A . l . . h s

```

```

CD47_HUMAN      80      90      100     110     120     130     140     150     160
Variola_virus  L L K G A S L K M D K S D A V S H T G N Y T C E V T E L T R E G E T I E K Y R V V S W F S P N E N I V I F P I F A L L F W G Q F G I K T L K Y R S G G M D E K T I L L
Ectromelia_virus L S D N D V S L I K Y D I L L . . . G A Y T T C E D N T G I . . . K S T V K L V O R R H N W F N D H H T M I M F F T G I T L F I F L E I A Y T S I S V V . . . F S N L G I H Q
Cowpox_virus     L S D S D V S I I M E Y D I L L . . . G A Y T T C E D N T G I . . . K S T V K L V O L H N W F N D Y Q T I M F F T G I T L F I F L E I A Y T S I S V V . . . F S N L G I H Q
Monkeypox_virus L S D S D V S I I M E Y D I L L . . . G A Y T T C E D N T G I . . . K S T V K L V O R H N W F N D Y Q T I M F F T G I T L F I F L E I A Y T S I S V V . . . F S N L G I H Q
Akhmeta_virus   L S D S D V S I I M E Y D I L L . . . G A Y T T C E D N T G I . . . K S T V K L V O R H N W F N D Y Q T I M F F T G I T L F I F L E I A Y T S I S V V . . . F S N L G I H Q
Yokapox_virus  A S E N D M S I I K Y D I L L . . . G A Y T T C E D S T G V . . . K S N I Q L V F K E H W F N D Y D T I M F F T G V T L F I F L L Q V I Y T S I S I R . . . F T N N V G I H Q
Taterapox_virus L S D N D V S I I E Y D I L L . . . G A Y T T C E D N T G I . . . K S T V K L V O R R H N W F N D H H T M I M F F T G I T L F I F L E I A Y T S I S V V . . . F S N L G I H Q
Skunkpox_virus L A D N D I S I I M E Y D I L L . . . G A Y T T C E D N N K G I . . . K H P V K L V O R R H N W F N D H Q T I M F F T G V T L L L I M S Q A Y T S I S V I . . . Y S N L G I H Q
Volepox_virus  L A D N D I S I I E Y D I L L . . . G A Y T T C E D N N K G I . . . K Y P V N L V O R R H N W F N D H Q T I M F F T G I T L L V A O A Y T S I S V I . . . Y S N N M G I H Q
Camelpox_virus L S D N D V S I I E Y D I L L . . . G A Y T T C E D N T G I . . . K S T V K L V O R R H N W F N D H H T M I M F F T G I T L F I F L E I A Y T S I S V V . . . F S N L G I H Q
Horsepox_virus L S D S D V S I I E Y D I L L . . . G A Y T T C E D N T G I . . . K F T V K L V O R R H N W F N D Y Q T I M F F T G I T L F I F L E I A Y T S I S V V . . . F S N L G I H Q
Alaskapox_virus L S D N D V S I I M E Y D I L L . . . G A Y T T C E D N T G I . . . K S N V T L V R R R H N W F N D H Q I L M F F T G V T L F I F L A E I M Y T S I S V V . . . F S N L G I H Q
consensus>70  l s d . D v S L i . e y k D i l . . . p G . Y T C . d n t g i . . . k . t ! . L v q r h n W F n d . q t m L m f I F t g i t l . L l . l # i . y t s i s v v . . . f s t n l g i l q

```

```

CD47_HUMAN      170     180     190     200     210     220     230     240     250
Variola_virus  V A G L V I T V I V V G A I L F V P G E Y S L K N A T G L G L I V T S T G I L L L H Y Y V S T A I G H T S F V I A H L V I O V I A Y L T A V V G I S L C A A C P M H C P I
Ectromelia_virus V F G C I I A M I E L C S G A F I L F S M F T L R H I I G I L M M T L P S I F L I I T K V F S N L L C H S C A V H L H H Y Y L A G Y Y I L T V F S L G I S L K E . . . . . D . . . H H H
Cowpox_virus     V F G C V I A M I E L C S G A F I L F S M F T L R H I I G I L M M T L P S I F L I I T K V F S N L L C H S C A V H L H H Y Y L A G Y Y I L T V F S L G I S L K E . . . . . D . . . H H H
Monkeypox_virus V F G C V I A M I E L C S G A F I L F S M F T L R H I I G I L M M T L P S I F L I I T K V F S N L L C H S C A V H L H H Y Y L A G Y Y I L T V F S L G I S L K E . . . . . D . . . H H H
Akhmeta_virus   V F G C V I A M I E L C S G A F I L F S M F T L R H I I G I L M M T L P S I F L I I T K V F S N L L C H S C A V H L H H Y Y L A G Y Y I L T V F S L G I S L K E . . . . . D . . . H H H
Yokapox_virus  F F C V I I I M I E L S S L I F F S M F T L R H I I G I L M M T L P S I F L I I T K V F S N V L N H S F G A V H V H H Y Y L A G Y Y I L T V F S L G I S L K E . . . . . I . . . H H H
Taterapox_virus V F G C I I A M I E L C S G A F I L F S M F T L R H I I G I L M M T L P S I F L I I T K V F S N L L C H S C A V H L H H Y Y L A G Y Y I L T V F S L G I S L K E . . . . . D . . . H H H
Skunkpox_virus V F G C I I A M I E L C S G A F I L F S M F T L R H I I G I L M M T L P S I F L I I T K V F S N L L C H S C A V H L H H Y Y L A G Y Y I L T V F S L G I S L K E . . . . . D . . . H H H
Volepox_virus  V F G C I V M V I E V S G A F I L F S M F T L R H I I G I L M M T L P S I F L I I T K V F S N I L S H S C A V H L H H Y Y L A G Y Y I L T V F S L G I S L K E . . . . . D . . . H H H
Camelpox_virus V F G C I I A M I E L C S G A F I L F S M F T L R H I I G I L M M T L P S I F L I I T K V F S N L L C H S C A V H L H H Y Y L A G Y Y I L T V F S L G I S L K E . . . . . D . . . H H H
Horsepox_virus V F G C I I A M I E L C S G A F I L F S M F T L R H I I G I L M M T L P S I F L I I T K V F S N L L C H S C A V H L H H Y Y L A G Y Y I L T V F S L G I S L K E . . . . . D . . . H H H
Alaskapox_virus V F G C V I A M V E L C S G A F I L F S M F T L R H I I G I L M M T L P S I F L I I T K V F S N L L C H S C S W H L H H Y Y O L A G Y Y I L T V F S L G I S L K E . . . . . D . . . H H H
consensus>70  v f g c ! ! a m ! e l . G a f L F y P s m % t $ r h i i G L l $ m t l p s i f L I i t k v % s F w . l . k L s c . V h l I i y y Q l a g y I L t ! l G l g I s l k e C v . . . d G t I

```

```

CD47_HUMAN      260     270     280     290     300
Variola_virus  H I S C T S I L A L A Q L L G L V Y M K F V A S N O K T I Q P P R K A V E E P L N A F K E S K G M M N D E
Ectromelia_virus H L S C D G T I M V S E H F S L L F L V C F P S T O R D Y Y . . . . .
Cowpox_virus     H L S C D G T I M V S E H F S L L F L V C F P S T O R D Y Y . . . . .
Monkeypox_virus H L S C D G T I M V S E H F S L L F L V C F P S T O R D Y Y . . . . .
Akhmeta_virus   H L S C D G T I M V S E H F S L L F L V C F P S T O R D Y Y . . . . .
Yokapox_virus  H L S C D G I S I S E H F S L L L V C F Q S I H R E Y Y . . . . .
Taterapox_virus H L S C D G T I M V S E H F S L L F L V C F P S T O R D Y Y . . . . .
Skunkpox_virus H L S C D G T I M V S E H F S L L F L V C F P S A O R D Y Y . . . . .
Volepox_virus  H L S C D G T I M V S E H F S L L F L V C F P S T O R D Y Y . . . . .
Camelpox_virus H L S C D G T I M V S E H F S L L F L V C F P S T O R D Y Y . . . . .
Horsepox_virus H L S C D G T I M V S E H F S L L F L V C F P S T O R D Y Y . . . . .
Alaskapox_virus H L S C D G T I M V S E H F S L L F L V C F P S T O R D Y Y . . . . .
consensus>70  H l S G l g t i m v s # h f s L l f $ v c f p S t o r d y y . . . . .

```
