# Supplementary material for: Structure of the human marker of self 5-transmembrane receptor CD47
Source: PubMed Central journal article supplement (PMC8410850; doi:10.1038/s41467-021-25475-w), 2021-09-01

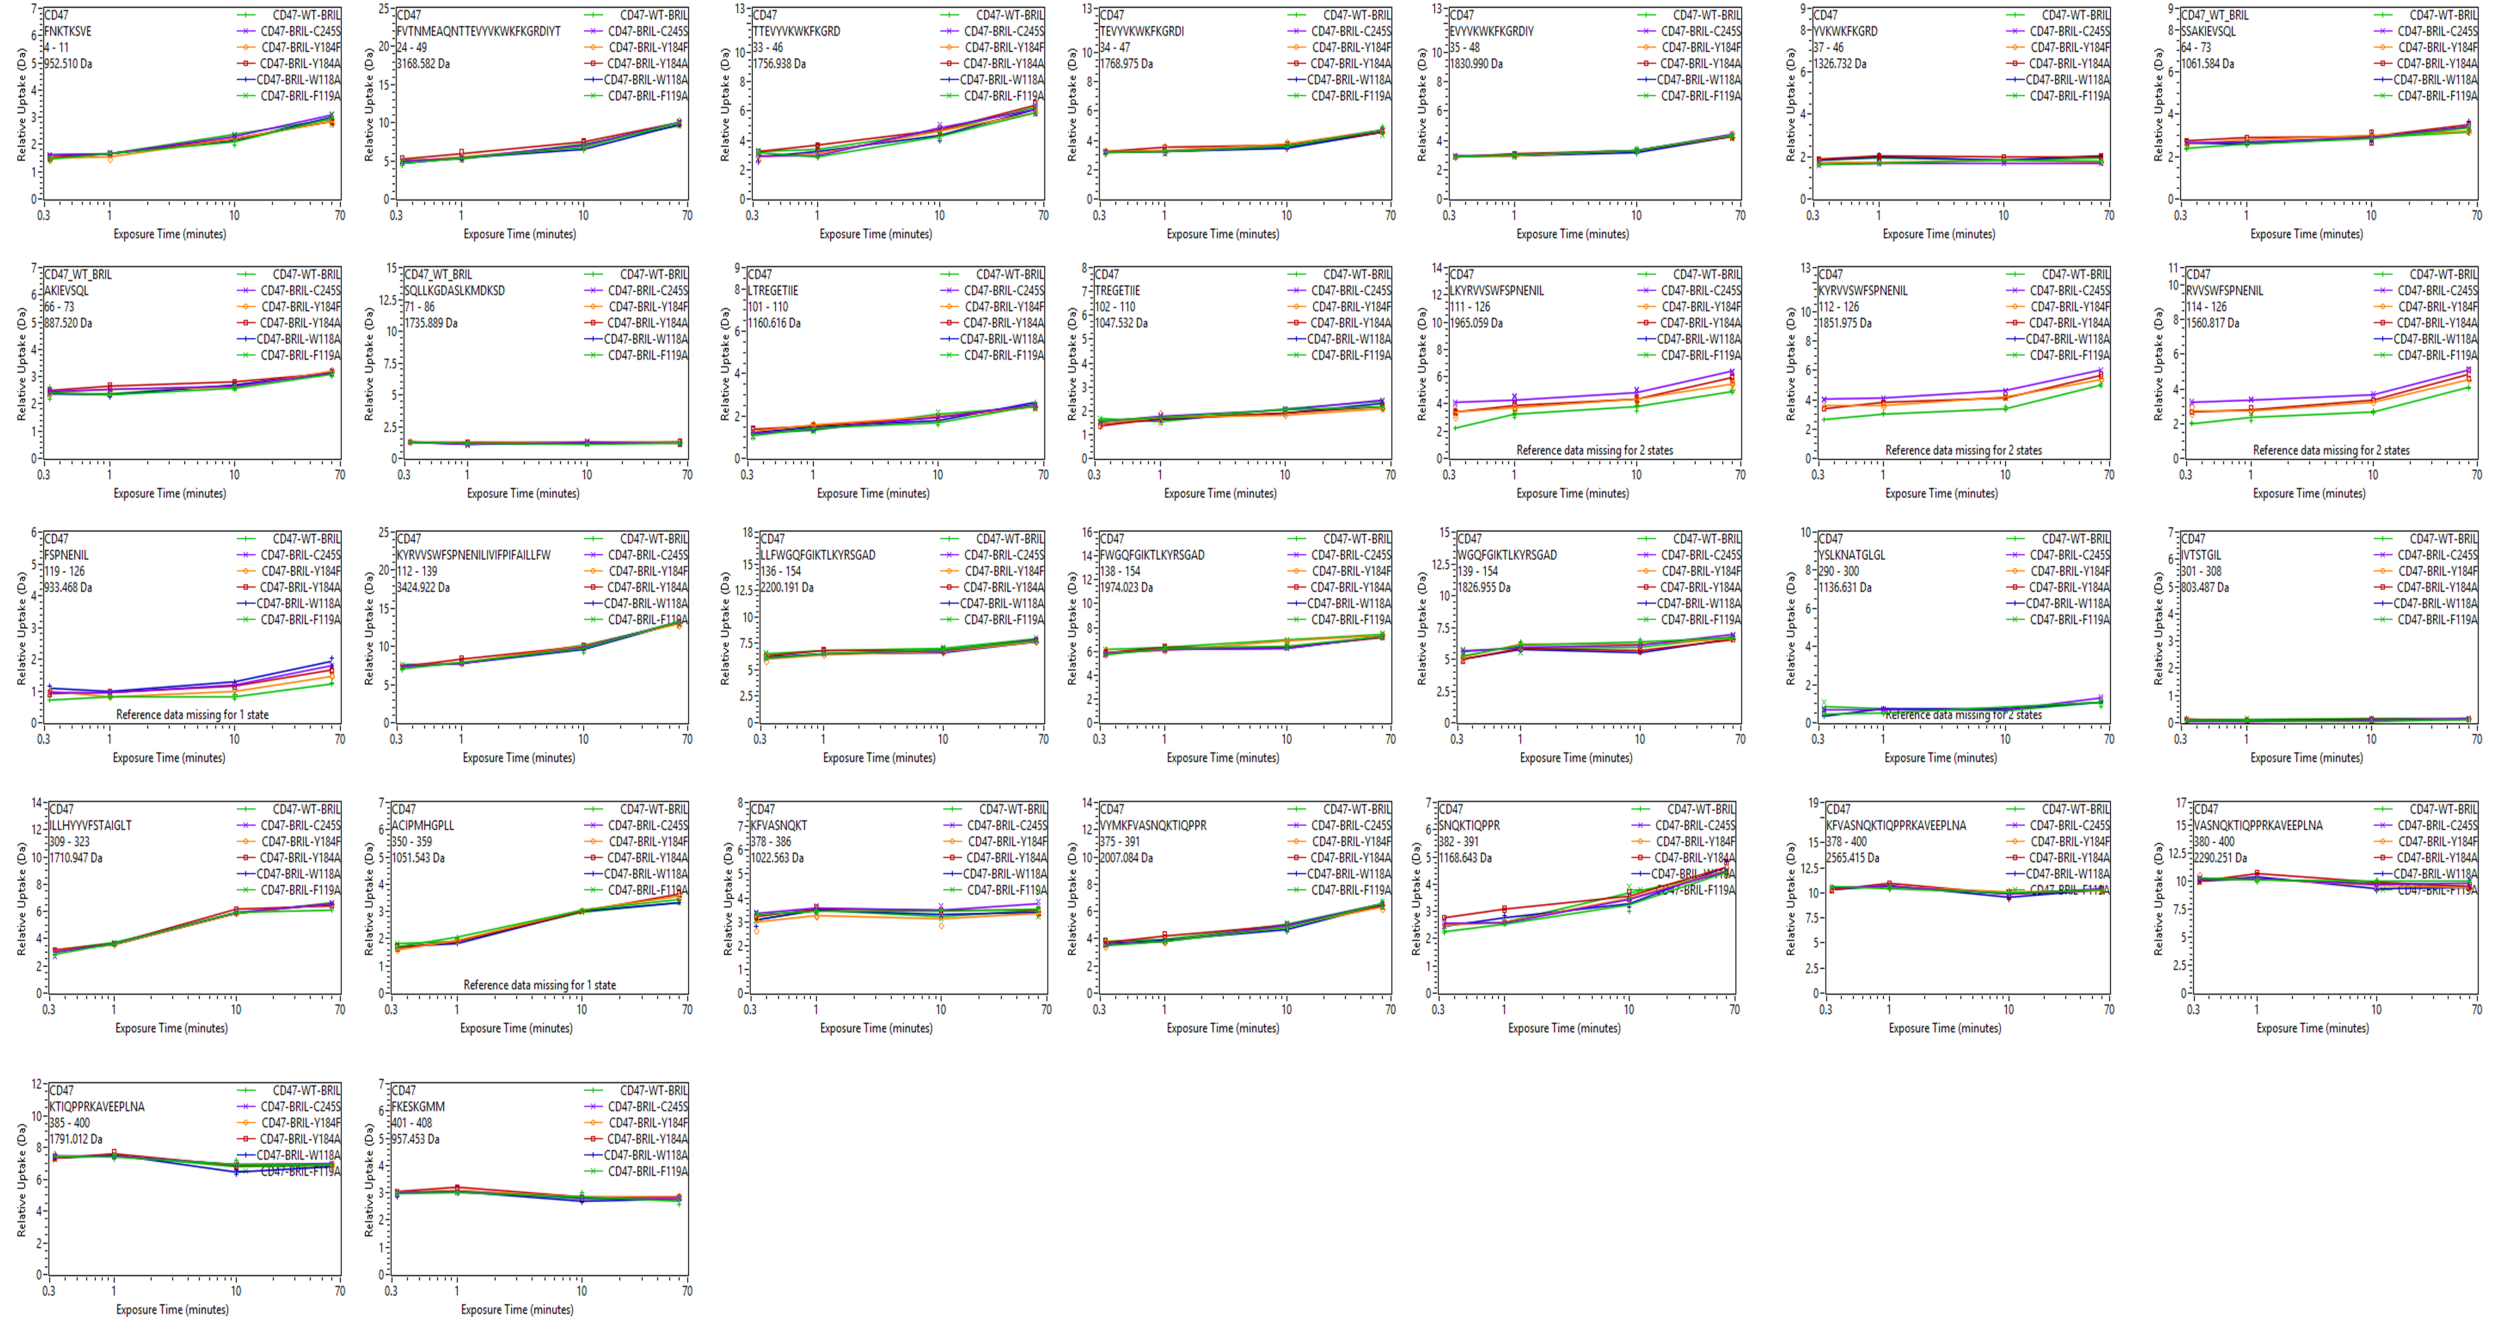

Supplement: 41467_2021_25475_MOESM9_ESM.pdf [file 41467_2021_25475_MOESM9_ESM.pdf]
